# Supplementary material for: The origin of Rhinocerotoidea and phylogeny of Ceratomorpha (Mammalia, Perissodactyla)
Source: PubMed Central journal article supplement (PMC7490376; doi:10.1038/s42003-020-01205-8), 2020-09-14
Supplement: 42003_2020_1205_MOESM1_ESM.pdf [file 42003_2020_1205_MOESM1_ESM.pdf]

1  
2  
3  
4  
5  
6  
7  
8  
9  
10  
11  
12  
13  
14  
15  
16  
17  
18  
19  
20  
21  
22  
23  
24  
25  
26  
27  
28  
29  
30  
31

## Supplementary materials

The origin of Rhinoceroidea and phylogeny of Ceratomorpha (Mammalia, Perissodactyla)

Bin Bai<sup>1,2\*</sup>, Jin Meng<sup>1,3,4</sup>, Chi Zhang<sup>1,2</sup>, Yan-Xin Gong<sup>1,2,5</sup>, Yuan-Qing Wang<sup>1,2,5\*</sup>

<sup>1</sup>Key Laboratory of Vertebrate Evolution and Human Origins of Chinese Academy of Sciences, Institute of Vertebrate Paleontology and Paleoanthropology, Chinese Academy of Sciences Beijing 100044, China; <sup>2</sup>CAS Center for Excellence in Life and Paleoenvironment, Beijing 100044, China; <sup>3</sup>Division of Paleontology, American Museum of Natural History New York 10024, USA; <sup>4</sup>Earth and Environmental Sciences, Graduate Center, City University of New York, New York 10016, USA; <sup>5</sup>College of Earth and Planetary Sciences, University of Chinese Academy of Sciences Beijing 100049, China

\* Correspondence and requests for materials should be addressed to B.B. (email: [baibin@ivpp.ac.cn](mailto:baibin@ivpp.ac.cn)), or to Y.Q.W. ([wangyuanqing@ivpp.ac.cn](mailto:wangyuanqing@ivpp.ac.cn)).

**Supplementary Figure 1:** Dental terminology of perissodactyls mentioned in the text and character list

**Supplementary Table 1:** Distributions of common synapomorphies

**Supplementary Table 2:** Temporal distributions of ceratomorph fossils for the Bayesian tip-dating analysis (Mya)

**Supplementary Note 1:** Detailed descriptions and additional discussion

**Supplementary Note 2:** Character list

**Supplementary Note 3.** Data matrix

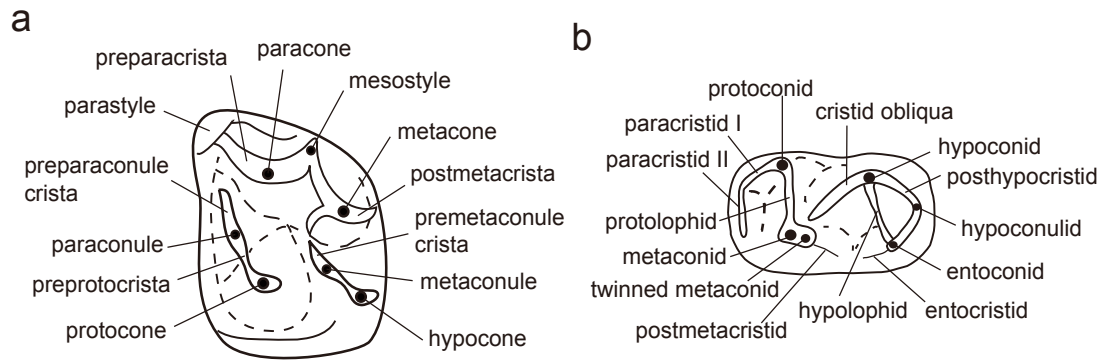

32

33

34 **Supplementary Figure 1.** Dental terminology of perissodactyls mentioned in the

35 text and character list. **a**, diagram of upper molar; **b**, diagram of lower molar

36 (modified from Hooker<sup>6</sup>).

37

38

39 **Supplementary Table 1.** Distributions of common synapomorphies (tree, fig. 7)

40

| Nod e | Clade                                          | Character and state                                                                                                               |
|-------|------------------------------------------------|-----------------------------------------------------------------------------------------------------------------------------------|
| A     | Ceratomorpha                                   | 70(1), 71(2), 85(1), 87(2), 101(0), 105(1), 106(1), 107(2), 111(1), 129(2), 133(1), 175(1), 196(1), 234(1), 262(2), 265(1)        |
| B     | Lophialetidae                                  | 37(1), 39(2), 42(1), 51(2), 63(2), 77(2), 104(2), 115(2), 117(0), 127(1), 138(1), 236(2), 245(1), 252(0), 271(1)                  |
| C     | Crown Ceratomorpha                             | 125(2), 157(0), 172(0), 295(1), 323(0), 325(0), 329(1), 354(1)                                                                    |
| D     | Tapiroidea                                     | 105(2), 169(1), 180(1), 181(1), 186(2), 221(0), 224(2), 234(2), 235(1), 258(2), 260(1), 269(1), 317(3), 335(0)                    |
| E     | New clade 1                                    | 44(2), 47(0), 49(0), 55(1), 196(0)                                                                                                |
| F     | New clade 2                                    | 18(3), 23(0), 32(1), 66(0), 89(0), 189(2), 220(0), 222(1), 231(2), 343(1)                                                         |
| G     | Tapiridae+ Deperetellidae                      | 49(0), 51(2), 53(35), 75(0), 80(35), 103(2), 196(0), 208(2), 286(1), 349(0)                                                       |
| H     | Rhinoceroidea (s.l.)                           | 23(0), 49(0), 75(0), 86(4), 195(3), 210(1), 227(1), 228(0), 263(1), 278(0), 281(2), 286(1)                                        |
| I     | Rhinoceroidea (s.s)                            | 53(1), 69(1), 74(1), 79(1), 80(1), 180(1), 234(0), 274(1), 351(2)                                                                 |
| J     | Rhinoceroidea (s.s) excluding <i>Hyrachyus</i> | 7(0), 12(1), 13(1), 14(1), 26(3), 29(1), 34(0), 51(2), 57(2), 77(2), 87(1), 96(2), 112(1), 127(2), 174(0), 189(1), 244(1), 269(1) |
| K     | New clade 3                                    | 231(2), 234(1), 243(0), 249(1), 252(0), 253(1)                                                                                    |

|   |                                      |                                                                                                                                                                                                         |
|---|--------------------------------------|---------------------------------------------------------------------------------------------------------------------------------------------------------------------------------------------------------|
| L | True<br>Rhinoceroidea                | 172(3), 173(1), 174(1)                                                                                                                                                                                  |
| M | Hyracodontidae                       | 38(2), 62(1), 104(2), 131(1), 203(2), 205(0), 233(1)                                                                                                                                                    |
| N | New clade 4                          | 3(2), 43(0), 94(1), 114(1), 144(2), 148(2), 189(0), 196(1), 254(3),<br>292(1), 293(2), 325(1), 327(1), 340(1), 343(1)                                                                                   |
| O | Forstercooperiidae                   | 13(0), 21(2), 32(1), 55(1), 69(0), 101(3), 121(2), 122(1), 135(2),<br>149(1), 197(1), 216(1), 224(0), 249(0), 272(0), 298(1), 323(1), 351(1)                                                            |
| P | New clade 5                          | 83(2), 99(1), 190(3), 200(0), 212(23), 215(1), 246(1)                                                                                                                                                   |
| Q | Amyndodontidae                       | 52(0), 53(0), 105(0), 106(0), 120(1), 125(1), 126(2), 127(0), 170(1),<br>172(0), 195(4), 213(1), 233(1)                                                                                                 |
| R | New clade 6                          | 36(0), 44(2), 60(2), 86(3), 89(1), 156(3)                                                                                                                                                               |
| S | Paraceratheriidae+<br>Rhinocerotidae | 98(0), 149(1), 183(1)                                                                                                                                                                                   |
| T | Paraceratheriidae                    | 27(1), 126(0), 141(1), 142(2), 146(0), 161(0), 189(1), 200(1), 253(0),<br>276(1), 295(0), 298(1)                                                                                                        |
| U | Rhinocerotidae                       | 3(3), 42(0), 53(5), 63(0), 104(2), 112(2), 138(1), 144(3), 147(1),<br>160(3), 173(0), 191(1), 213(1), 223(1), 259(1), 273(2), 285(2),<br>291(0), 292(1), 293(1), 296(2), 300(2), 302(2), 304(1), 341(0) |

41

42

43

44 **Supplementary Table 2.** Temporal distributions of ceratomorph fossils for the

45 Bayesian tip-dating analysis (Mya)

46

| Taxa                              | Min  | Max  |
|-----------------------------------|------|------|
| <i>Sifrhippus_sandrae</i>         | 55.8 | 56.0 |
| <i>Protorohippus_venticolum</i>   | 52.0 | 53.4 |
| <i>Orientalophus</i>              | 55.0 | 56.0 |
| <i>Cardiophus_radinskyi</i>       | 52.0 | 56.0 |
| <i>Homogalax_protapirinus</i>     | 52.0 | 55.5 |
| <i>Chowliia_laoshanensis</i>      | 53.4 | 55.0 |
| <i>Meridiolophus_expansus</i>     | 52.0 | 55.0 |
| <i>Isectolophus_latidens</i>      | 39.9 | 52.0 |
| <i>Karagalax_mamikhelensis</i>    | 52.0 | 56.0 |
| <i>Gandheralophus</i>             | 45.0 | 52.0 |
| <i>Yimengia</i>                   | 45.0 | 52.0 |
| <i>Rhodopagus_pygmaeus</i>        | 39.9 | 45.0 |
| <i>Indolophus</i>                 | 39.9 | 42.0 |
| <i>Heptodon</i>                   | 49.2 | 55.5 |
| <i>Helaletes_nanus</i>            | 39.9 | 52.0 |
| <i>Desmatotherium_intermedius</i> | 47.8 | 48.5 |

|                                  |      |      |
|----------------------------------|------|------|
| <i>Paracolodon_fissus</i>        | 33.9 | 45.0 |
| <i>Dilophodon_minusculus</i>     | 43.0 | 49.2 |
| <i>Selenaletes_scopaeus</i>      | 49.2 | 53.4 |
| <i>Colodon_occidentalis</i>      | 29.7 | 47.8 |
| <i>Plesiocolopirus_hancocki</i>  | 39.9 | 43.0 |
| <i>Hesperaletes_borineyi</i>     | 39.9 | 47.8 |
| <i>Irenolophus</i>               | 45.0 | 52.0 |
| <i>Telelophus_medius</i>         | 42.0 | 45.0 |
| <i>Deperetella</i>               | 39.9 | 42.0 |
| <i>Minchenoletes_erlianensis</i> | 55.0 | 56.0 |
| <i>Schlosseria_magister</i>      | 45.0 | 52.0 |
| <i>Lophialetes_expeditus</i>     | 42.0 | 45.0 |
| <i>Eoletes</i>                   | 42.0 | 45.0 |
| <i>Ampholophus_luensis</i>       | 53.4 | 55.0 |
| <i>Kalakotia</i>                 | 42.0 | 45.0 |
| <i>Breviodon_acares</i>          | 42.0 | 45.0 |
| <i>Protapirus</i>                | 29.7 | 33.9 |
| <i>Hyrachyus_modestus</i>        | 48.5 | 53.0 |
| <i>Ephyrachyus</i>               | 47.8 | 48.5 |
| <i>Fouchia</i>                   | 49.2 | 52.0 |
| <i>Triplopus?_youjingensis</i>   | 45.0 | 52.0 |
| <i>Triplopus_cubitalus</i>       | 37.8 | 47.8 |
| <i>Epitriplopus_uintensis</i>    | 37.8 | 47.8 |
| <i>Triplopides_rieli</i>         | 36.5 | 37.8 |
| <i>Prohyracodon</i>              | 33.9 | 45.0 |
| <i>Hyracodon_nebraskensis</i>    | 29.0 | 39.9 |
| <i>Ardynia</i>                   | 23.0 | 37.2 |
| <i>Gobioceras</i>                | 45.0 | 52.0 |
| <i>Pappaceras</i>                | 45.0 | 52.0 |
| <i>Forstercooperia</i>           | 39.9 | 45.0 |
| <i>Proeggysodon_qiui</i>         | 33.9 | 37.2 |
| <i>Eggysodon</i>                 | 23.0 | 33.9 |
| <i>Juxia</i>                     | 37.2 | 42.0 |
| <i>Urtinotherium</i>             | 33.9 | 42.0 |
| <i>Paraceratherium</i>           | 23.0 | 33.9 |
| <i>Rostriamynodon_grangeri</i>   | 42.0 | 45.0 |
| <i>Caenolophus_promissus</i>     | 39.9 | 45.0 |
| <i>Amynodon</i>                  | 39.9 | 48.5 |
| <i>Sharamynodon_mongoliensis</i> | 39.9 | 45.0 |
| <i>Cadurcodon</i>                | 30.5 | 37.2 |
| <i>Paramynodon</i>               | 39.9 | 42.0 |
| <i>Metamynodon</i>               | 29.7 | 43.0 |

|                                  |      |      |
|----------------------------------|------|------|
| <i>Uintaceras_radinskyi</i>      | 37.8 | 47.8 |
| <i>Teletaceras</i>               | 37.8 | 39.9 |
| <i>Trigonias</i>                 | 32.0 | 37.8 |
| <i>Subhyracodon_occidentalis</i> | 28.0 | 37.8 |
| <i>Menoceras_arikareense</i>     | 17.5 | 23.0 |

47

48

49

50 **Supplementary Note 1.**

51 **Detailed descriptions**

52

Perissodactyla

53

Rhinocerotoida Gray, 1825

54

Family incertae sedis

55

*Yimengia* Wang, 1988

56

**Emended diagnosis** (modified from Wang<sup>1</sup>). small to medium size rhinocerotoids;

57

cranium with a narial notch presumably not very deep, a large orbit, and a large,

58

deep preorbital fossa; symphyseal region long and narrow; dental formula,

59

3·1·4·3/3·1·(3-4)·3; upper incisors spatulate; canine relatively small with a long

60

postcanine diastema; premolar non-molariform with P4 metaconule joining the

61

protocone in a relatively low position; upper molars with a small to medium

62

parastyle slightly lingually placed to the paracone, a pinched, sharp paracone, a

63

straight centrocrista, and a flat, relatively long, lingually situated metacone; M3

64

metacone reduced and lingually appressed; lower premolars without entoconid; p3

65

metaconid reduced and small with a slightly buccally directed paralophid; cristid

66

obliqua high, slightly lingually directed with the buccal wall somewhat lingually

67

tilted on p3-4; lower molars with relatively strong, anterior directed cristid obliqua,

68

and an arched, long paralophid; m3 without the hypoconulid lobe.

69

**Comments**

70

*Yimengia* is considered to be closely related to *Rhodopagus*<sup>1</sup>, however, the

71

phylogenetic relationship of *Rhodopagus* is still a matter of debate. *Rhodopagus* was

72

initially tentatively assigned to Lophialetidae with a query based on its elongated

73 ectoloph<sup>2</sup>, and the assignment was supported by Gabunia and Kukhaleishvili<sup>3</sup>. Lucas  
74 and Schoch<sup>4</sup> considered *Rhodopagus* to be a hyracodontid rhinocerotoid, while  
75 Dashzeveg and Hooker<sup>5</sup> regarded Rhodopagidae as a rhinocerotoid, but distinct  
76 from hyracodontids. Hooker<sup>6</sup> proposed a sister relationship between Rhodopagidae  
77 and Deperetellidae, but the similarities were later attributed to convergence<sup>5</sup>.

78

79

*Yimengia magna* sp. nov.

80 **Holotype.** IVPP V 26234, a right mandible with dp4, m1, and m3.

81 **Locality and horizon.** upper part of the Nomogen Formation, Nuhetingboerhe.

82 **Description.** P3/4 (IVPP V 26238) (Fig. 2d): The ectoloph of the tooth is broken off,  
83 but the metacone should be present as indicated by the preserved lingual part of the  
84 ectoloph. The protocone is situated at the lingual side without any trace of posterior  
85 extension. The protoloph is relatively high, joining the preparacrista and the  
86 protocone. The metaloph contacts the ectoloph between the paracone and the  
87 metacone, and as high as the joint between the protoloph and the ectoloph. The  
88 metaloph somewhat obliquely extended, joining the protocone slightly below its  
89 apex. The basin posterior the metaloph is relatively wide. The cingula are  
90 continuous at the anterior, lingual, and posterior sides, but are relatively weaker on  
91 the lingual side.

92 M1-2 (V 26241, fig 2f): The M1 is moderately worn with the paracone and  
93 parastyle broken off, and M2 is nearly unworn and larger than M1. The tooth is  
94 quadrate in outline. The paracone is sharp, strongly pinched on the buccal side,  
95 whereas the metacone is strongly lingually appressed with a weak rib (M1) or nearly  
96 flat (M2) on the buccal side. The parastyle is relatively strong on M2, placed  
97 anterior to the paracone, and separated from the latter. The centrocrista is straight.  
98 The postmetacrista is relatively long and posterobuccally deflected. The protocone is  
99 conical and situated at the level of the paracone. The protoloph is slightly anteriorly  
100 arched and joins the preparacrista, which is more lingually than anteriorly directed.

101 The metaloph is nearly as long as and parallel to the protoloph, and slightly more  
102 lingually extended than the protoloph. The metaloph joins the ectoloph at the point  
103 anterior to the apex of the metacone by a short curve. The anterior cingulum is more  
104 distinct than the posterior one, and a weak cingulum is present at the buccal base of  
105 the metacone. The anterior cingulum is continuous at the lingual base of the  
106 protocone on M2.

107 M3 (V 26241, Fig. 2e): The tooth is trapezoid in outline with the posterior  
108 border considerably shorter than the anterior border. Its general morphology is  
109 similar to that of M2, but is different in having a more buccally projected and  
110 smaller parastyle, a highly reduced metacone with a slightly convex buccal surface,  
111 a short postmetacrista posteriorly extended, and the protocone situated at the level  
112 slightly anterior to the paracone.

113 m1 (Fig. 2a, c): The tooth is rectangular in outline with the talonid wider and  
114 longer than the trigonid. The protolophid is notched in the middle and nearly  
115 transverse extended with the metaconid slightly posteriorly situated to the level of  
116 the protoconid. Both the protoconid and the metaconid bear a distinct rib on the  
117 anterior surface of the protoloph, and the two ribs converge at the base of the  
118 trigonid. The paralophid extends anteriorly and slightly lingually from the  
119 protoconid and then smoothly curves to the lingual side. The hypolophid lacks a  
120 notch, and is more oblique than the protolophid. The buccal wall of the hypoconid is  
121 slightly lingually slanted. The cristid obliqua extends anteriorly and slightly  
122 lingually from the hypoconid, joining the posterior wall of the protolophid at a point  
123 roughly half the height of the wall on an unworn tooth. The angle between the  
124 hypolophid and the cristid obliqua is slightly greater than 90° with meeting at a  
125 sharp angle, which should become gentler after wear as inferred from the somewhat  
126 swollen buccal side of the hypoconid. The entoconid bears a distinct anterior cristid.  
127 The anterior cingulid arises towards the lingual side and surrounds the anterobuccal  
128 corner of the crown. A weak cingulid is present at the base of the ectoflexid. The

129 posterior cingulid is weak without a cuspid.

130 m3 (Fig. 2b): Two teeth were assigned to m3. One (V 26234) is associated with  
131 dp4-m1 and partially erupted. This tooth is assigned to m3 rather than m2 because  
132 its root has not been formed, which is not consistent with the fragmentary root of m2  
133 preserved on the mandible. Its morphology is generally similar to that of m1, but is  
134 different in being larger, and in having a more anteriorly extended paralophid, less  
135 distinct ribs on the anterior surface of the protoconid and the metaconid, a less  
136 notched protolophid (but moderately notched on V 26236), and a cristid obliqua  
137 contacting the protolophid in a relatively lower position. Further, the posterior  
138 cingulid is somewhat developed into a small cuspid representing a highly reduced  
139 hypoconulid.

140 dp3 (Fig. 2c): The tooth is anteroposteriorly elongated with the talonid wider  
141 than the trigonid. The trigonid is longer than wide with a well-developed paraconid,  
142 which is nearly as high as the protoconid. From the apex of the paraconid three  
143 ridges extend: two posterolingually and posterobuccally, and a short third one  
144 anteriorly. The protolophid is slightly notched, oblique, and short with the  
145 metaconid not widely separated from the protoconid. The paralophid extends  
146 anteriorly and slightly buccally from the protoconid. The hypolophid is also oblique  
147 and parallel to the protolophid, and less notched than the latter. The cristid obliqua  
148 extends anterolingually from the hypoconid, and terminates at a point slightly  
149 lingual to the protoconid in a relatively high position. A distinct ridge descends  
150 anteriorly from the entoconid to the base of the talonid, whereas a short, less distinct  
151 cristid descends from the posterior side of the metaconid. The cingulids are faint at  
152 the buccal side of the trigonid, and weak on the posterior side. (dp3: L=8.8 mm, W  
153 of Trigonid=4.0 mm, W of Talonid=4.8 mm, V 26235)

154 dp4 (Fig. 2a, c): The tooth is generally similar to m1 in morphology, but can be  
155 distinguished by a more distinct rib on the anterior side of the metaconid, and a more



156 distinct, longer cristid anterior to the entoconid. (dp4: L=9.2 mm, W of Trigonid=5.4  
157 mm, W of Talonid=6.1 mm, V 26234)

158

159 *Yimengia chaganense* sp. nov.

160 **Holotype.** IVPP V 26242.1, associated left and right maxillae including P4-M3 with  
161 ectolophs partially broken off.

162 **Locality and horizon.** lower horizon of the middle part of the Arshanto Formation,  
163 Chaganboerhe.

164 **Description.** P4 (Fig. 3a): The tooth is rectangular in outline with a rounded lingual  
165 border. The parastyle is high, somewhat pillar-like, and separated from the paracone  
166 by a distinct groove on the buccal surface. The paracone bears a prominent rib on  
167 the buccal side, while the metacone is nearly flat. The parastyle, paracone, and  
168 metacone are aligned in a longitudinal line. The protocone is conical, and the  
169 protoloph extends to the anterolingual side of the paracone in a relatively high  
170 position. The metaloph (or metaconule) is lower and shorter than the protoloph,  
171 joining the ectoloph between the paracone and the metacone, but contacts the  
172 midpoint of the height rather than the apex of the protocone. Thus, the medifossette  
173 is not completely closed on the posterior side. A distinct cingulum is present and  
174 continuous on the anterior, lingual, and posterior sides, as well as the buccal side of  
175 the metacone.

176 M1 (Fig. 3a-b): The tooth is quadrate in outline with the width slightly greater  
177 than the length. The paracone is high and sharp with a pinched rib on the buccal side,  
178 whereas the metacone is lingually placed and tilted with a flat buccal surface. The  
179 centrocrista is straight or slightly buccally convex. The postmetacrasta is moderately  
180 long and buccally deflected. The parastyle is relatively small, situated anterolingual  
181 to the paracone, and somewhat pillar-like rather than cusped. The protocone is  
182 directly lingual to the paracone. The protoloph is arched anteriorly, smoothly joining  
183 the preparacrasta. The metaloph is short, contacting the ectoloph anterior to the apex

184 of the metacone. The cingulum is almost continuous at the anterior, lingual, and  
185 posterior sides, but interrupted at the base of the hypocone. A distinct buccal  
186 cingulum is present at the base of the metacone.

187 M2 (Fig. 3a): All the second upper molars available are partially damaged.  
188 However, the morphology of M2—is similar to that of M1 as inferred from the  
189 combined preserved parts. The cingulum is nearly absent at the lingual, as well as  
190 the posterior side of the hypocone.

191 M3 (Fig. 3a): The tooth is roughly triangular in outline. The morphology is  
192 similar to that of M1-2, but the metacone is more reduced, more lingually placed and  
193 deflected. The metaloph is much shorter and more confluent with the centrocrista.  
194 The lingual cingulum is absent as on M2.

195 p3 (Fig. 3c): The tooth is rectangular in outline with the talonid slightly shorter  
196 and wider than the trigonid. The buccal paralophid descends anteriorly and slightly  
197 buccally from the protoconid to a moderately high paraconid, and then turns  
198 lingually for a short distance. The metaconid is slightly smaller than the protoconid,  
199 and closely posterolingually placed to the latter, resulting an oblique, short  
200 protolophid. The hypoconid is large, and as high as the paraconid. The cristid  
201 obliqua extends anterolingually toward the protoconid, joining the posterior wall of  
202 the protolophid in a relatively high position. The buccal wall of the cristid obliqua is  
203 somewhat lingually slanted. A very weak cingulid at the lingual base of the talonid  
204 represents a rudimentary entoconid. The buccal cingulid is faint, whereas the lingual  
205 cingulid is absent.

206 p4 (Fig. 3c): The tooth is similar to p3, but the metaconid is as large as the  
207 protoconid, and widely separated from the latter. The protolophid is—slightly less  
208 oblique, and the cristid obliqua joins the protoloph slightly lingual to the protoconid.  
209 A weak hypolophid extends posterolingually from the hypoconid for a short distance,  
210 and then descends to the lingual cingulid at the base of the talonid.

211 m1/2 (Fig. 3d-e): The tooth is rectangular with the talonid slightly wider than

212 the trigonid. The metaconid is slightly posterior to the protoconid, and the  
213 protolophid is nearly transversely extended with a very shallow notch in the middle.  
214 The paralophid descends from the protoconid anteriorly and slightly lingually to a  
215 low position, and then curves lingually for a short distance. The entoconid is  
216 posteriorly placed to the hypoconid. The hypolophid is complete without a notch  
217 and more oblique than the protolophid. The cristid obliqua is strong, extending from  
218 the hypoconid to the posterior wall of the protolophid at a roughly middle height,  
219 and slightly lingual to the protoconid. The anterior cingulid is continuous with the  
220 buccal cingulid of the trigonid, which is somewhat interrupted. The posterior  
221 cingulid is distinct and slightly elevated in the middle, representing a weak  
222 hypoconulid. The lingual cingulid is absent.

223 DP2 (Fig. 3b): The parastyle is broken off on both sides of the maxilla. The  
224 posterior part of the tooth is much wider than the anterior one. The paracone is the  
225 main cusp of the ectoloph, approximately situated in the midline with a convex  
226 buccal surface. The protoloph is mainly composed of the paraconule, from which  
227 two ridges originate: one extends buccally to the preparacrista, while the other  
228 descends posterolingually with a shallow lingual furrow and not in contact with the  
229 protocone. Thus, the protoloph forms a sharp angle. The protocone is large and  
230 posterolingually placed. The metaloph is stronger than the protoloph. A weak  
231 cingulum is discernable at the buccal base of the metacone. A tiny cuspid is present  
232 at the opening of the middle valley. Other characters are obscure due to the heavily  
233 worn state. (DP2: L=5.7 mm, W=6.0 mm, V 26242.2)

234 DP3 (Fig. 3b): The tooth is heavily worn, and rectangular in outline with the  
235 posterior part slightly wider than the anterior part. The parastyle is relatively small  
236 and anterior to the paracone. The paracone is sharp with a convex buccal surface,  
237 whereas the metacone is marginally more lingually placed with a slightly convex  
238 buccal surface. The postmetacrista is relatively short, and directed posteriorly and  
239 slightly buccally. The hypocone is as large as and more lingually extended than the

240 protocone. The protoloph and metaloph are completely separated on the lingual side.  
241 The cingula are continuous on the anterior, lingual, and posterior sides. A distinct  
242 cingulum is also present at the buccal side of the metacone. (DP3: L=7.2 mm,  
243 W=7.2 mm, V 26242.2)

244 DP4 (Fig. 3b): The tooth is very similar to M1-2 in morphology with  
245 equally-developed protoloph and metaloph except for a less lingually placed  
246 metacone with a shorter postmetacrista. (DP4: L=7.8 mm, W=8.3 mm, V 26242.2)

247 dp4 (Fig. 3e): The dp4 is similar to m1/2 in morphology, but can be distinguished by  
248 smaller size and more distinct ribs on the anterior sides of the metaconid and the  
249 protoconid. (dp4: L=7.5 mm, W of Trigonid=4.4 mm, W of Talonid=4.6 mm, V  
250 26247.2)

251

252 Hyracodontidae Cope, 1879

253 *Triplopus? youjingensis* sp. nov.

254 **Holotype.** IVPP V 26248, a right mandible with p2-m3 (Fig. 5a).

255 **Locality and horizon.** Basal part of the Arshanto Formation, Nuhetingboerhe.

256 **Description.** p1: Only a single alveolus is present but, based on this, the tooth is not  
257 greatly reduced in size.

258 p2: The anterobuccal part of the enamel is broken off, but the dentin is still  
259 preserved. The crown is oval in outline with a main cusp (protoconid) in the middle.  
260 Two ridges descend from the protoconid anteriorly to the paraconid, and posteriorly  
261 to the hypoconid, in a relatively high position. The talonid is slightly wider and  
262 deeper than the trigonid. The entoconid is almost absent, but represented by a  
263 swelling at the posterolingual base of the talonid. The lingual cingulid is absent, and  
264 a posterior cingulid is discernable.

265 p3: The tooth is cracked longitudinally, and was broken off at the antero- and  
266 posterolingual parts. The trigonid is longer than wide with a relatively short  
267 protolophid. The metaconid is as large as, and slightly posteriorly situated to the

268 protoconid, resulting in a slightly oblique protolophid. The paralophid descends  
269 anteriorly from the protoconid to a relatively high paraconid, and then extends  
270 lingually for an unknown distance due to breakage. The cristid obliqua ascends  
271 anteriorly from the prominent hypoconid to the protoconid in a high position. The  
272 posterolingual part of the talonid is swollen, indicating an incipient entoconid, and a  
273 low, weak ridge between the entoconid and hypoconid represents a rudimentary  
274 hypolophid. The cingulid is absent on the lingual and buccal sides.

275 p4: The tooth is roughly rectangular in outline with the talonid shorter and  
276 slightly wider than the trigonid. The metaconid is as large as the protoconid, and  
277 slightly posteriorly placed to the latter. Thus, the protolophid is nearly transverse.  
278 The paralophid descends anteriorly and slightly lingually from the protoconid to a  
279 relatively high paraconid, and then descends lingually to the base of the trigonid.  
280 The hypoconid is strong and high, and the cristid obliqua slightly rises to the lingual  
281 part of the protoconid in a high position. Although the entoconid is broken off, there  
282 is a transversely extended, faint swollen low ridge between the hypoconid and  
283 presumably present entoconid, foreshadowing the incipient hypolophid as in p3.  
284 Weak cingulids are present at the base of the trigonid and the buccal side of the  
285 talonid.

286 m1-2: The m1 is heavily worn and the m2 is moderately worn. The tooth is  
287 rectangular in outline with the talonid slightly longer than the trigonid. The  
288 protolophid is slightly oblique and parallel to the hypolophid. The paralophid  
289 extends anterolingually from the protoconid to the paraconid, and then extends  
290 lingually for a short distance. The cristid obliqua extends anteriorly to the  
291 protolophid in a high position slightly lingual to the protoconid. The anterior  
292 cingulum is relatively distinct, slightly wrapping the trigonid at the lingual and  
293 buccal base, but does not enclose the trigonid. A weak cingulid is present at the base  
294 of the ectoflexid.

295 m3: The tooth is similar to m1-2, but is relatively longer and narrower. The  
296 paralophid is more anteriorly extended, and descends to a relatively high paraconid.  
297 A relatively long cristid obliqua extends anteriorly from the hypoconid and then  
298 turns somewhat lingually at its anterior end, joining the posterior wall of the  
299 protolophid in a relatively high position, which is higher than the middle height of  
300 the protolophid. The posterior cingulid is partially broken off, but the hypoconulid  
301 was apparently highly reduced and cingulid-like.

302 The preserved horizontal ramus is relatively shallow with a slightly convex  
303 ventral border. Three mental foramina are present below the postcanine diastema, p1,  
304 and p2, respectively. The posterior border of the symphyseal region is at the level of  
305 the anterior border of p1.

306

307 Forstercooperiidae Kretzoi, 1940

308 *Gobioceras wangi* gen. et sp. nov.

309 **Holotype.** IVPP V 26249, a right mandible with m1-m3.

310 **Locality and horizon.** Basal part of the Arshanto Formation, Nuhetingboerhe.

311 **Description.** M3 (Fig. 5c): The tooth is roughly triangular in outline. The paracone  
312 is vertically placed, bearing a strong paracone rib on the buccal side that is slightly  
313 posteriorly directed. The metacone is considerably lingually placed, nearly flat, and  
314 reduced to a short ridge with a shallow notch in the middle. The parastyle is strong,  
315 more buccally projected than the paracone, and is separated from the paracone and  
316 somewhat compressed. The protocone is directly lingual to the paracone. The  
317 protoloph is long and joins the ectoloph between the preparacrista and the parastyle.  
318 The hypocone is as lingually placed as the protocone, but smaller. The metaloph is  
319 very short and nearly confluent with the centrocrista, resulting in a triangular outline  
320 of the crown. The anterior cingulum is much stronger than the posterior one, and a  
321 feeble lingual cingulum is present at the base of the middle valley. (M3: L=21.1 mm,  
322 W=24.0 mm, V 26250.1).

323 Only a fragmentary ectoloph of M2 is preserved (Fig. 5d), and probably from  
324 the same individual as the M3. The metacone is nearly flat and moderately lingually  
325 placed, bearing an indistinct metacone rib. Although the parastyle is partially broken,  
326 it is likely as strong as that of M3.

327 A right mandible is preserved with m1-3 and the alveoli of p1-4 (Fig. 5b).

328 m1-2 (Fig. 5b): The m1 and m2 are similar in morphology, with the talonid  
329 wider and longer than the trigonid. The trigonid is obliquely U-shaped with the  
330 protolophid posterolingually extended and parallel to the relatively long anterior  
331 branch of the paralophid. The buccal branch of the paralophid is perpendicular to its  
332 anterior branch anteriorly and the protolophid posteriorly. The hypolophid is also  
333 oblique and parallel to the protolophid, and smoothly rather than sharply joints the  
334 cristid obliqua at the hypoconid. The cristid obliqua is relatively short, contacting  
335 the protolophid slightly lingual to the protoconid in a relatively high position (above  
336 the half height of the protolophid). Anterior to both the metaconid and entoconid,  
337 there is a weak ridge. A weak cingulid is present on the buccal side and continuous  
338 to the posterior side. The lingual cingulid is absent. Another specimen (IVPP V  
339 26251) shows some variation in that the size is slightly smaller, and the buccal  
340 cingulid is only present at the base of the ectoflexid.

341 m3 (Fig. 5b): The entoconid of m3 is broken. The tooth is generally similar to  
342 the preceding molars. It mainly differs from m1-2 in having a relatively longer  
343 trigonid, a cristid obliqua anteriorly extended, and a nearly absent buccal cingulid.  
344 Furthermore, a small cuspid is present approximately at the midline of the anterior  
345 wall of the protolophid.

346

347 Hyracodontidae Cope, 1879

348 *Ephyrachyus* Wood, 1934

349 **Remarks**

350 Wood<sup>7</sup> thoroughly reviewed hyrarchyids from North America, a group consisting-of

351 four genera and 12 species. Radinsky<sup>8</sup>, however, considered only one genus,  
352 *Hyrachyus*, and three species to be valid, including *H. modestus* and *H. eximius*  
353 from North America and *H. minimus* from Europe. European ‘*Chasmotherium*’  
354 *stehlini* was also considered a synonym of *H. modestus*<sup>8</sup>. Radinsky<sup>9</sup> further  
355 reassigned some species of hyrachiids to *Triplopus* or *Forstercooperia*. As pointed  
356 out by Schoch<sup>10</sup>, Wood’s revision may have been ‘oversplit’, whereas Radinsky’s  
357 revision probably represented an extreme taxonomic “lumping”. Four genera of  
358 hyrachiids have been reported from Asia, including *Hyrachyus*<sup>11</sup>, *Subhyrachyus*<sup>12</sup>,  
359 *Aktauhyus*<sup>13,14</sup>, and probably *Jhagirilophus*<sup>15</sup>. However, Lucas et al.<sup>16</sup> treated  
360 *Subhyrachyus* as a synonym of the lophialetid *Eoletes*. Four species of *Hyrachyus*  
361 have been reported from Asia, consisting of *H. asiaticus*<sup>17</sup>, *H. metalophus*<sup>18</sup>, *H.*  
362 *modestus*<sup>18,19</sup>, and *H. tongi*<sup>11</sup>. ‘*Hyrachyus*’ *minor*, as well as ‘*H.*’ *lunanensis*, from  
363 the Lumeiyi Formation of the Lunan Basin, Yunnan Province could be included in  
364 *Aktauhyus*<sup>13</sup>.

365

366 *Ephyrachyus woodi* sp. nov.

367 **Holotype.** IVPP V 26252, a right maxilla with P2-M3, right and left p2-3, and  
368 fragments p4 and lower molars.

369 **Locality and horizon.** lower horizon of the upper part of the Arshanto Formation,  
370 Chaganboerhe

371 **Description.** P2 (Fig. 6a): The tooth is roughly quadrilateral in outline with a  
372 rounded lingual border. The paracone and the metacone are rudimentary and  
373 separated with the metacone slightly smaller and lower than the paracone. The  
374 paracone and the metacone merged with a sharp ectoloph, extending a longer ridge  
375 anteriorly from the paracone and a short ridge posteriorly from the metacone. The  
376 buccal surface of the paracone and the metacone are slightly convex with a weaker  
377 metacone rib. The parastyle is low and rather weak. The protocone is large and  
378 conical and is directly lingual to the paracone. The protoloph extends anterobuccally



379 from the protocone but dies out before reaching the anterolingual base of the  
380 paracone. The metaloph, mainly composed of the metaconule, is lower and shorter  
381 than the protoloph, joining to the anterolingual base of the metacone and separated  
382 from the protocone by a moderately deep valley. A weak cingulum continues around  
383 the posterior and lingual bases of the crown, but is absent at the base of the  
384 protocone. A weak cingulum is present buccal to the metacone.

385 P3 (Fig. 6a): The tooth is quadrilateral in outline with the width greater than the  
386 length. The paracone and the metacone are closely placed, equal in size, and merged  
387 into the ectoloph. The buccal surfaces of the paracone and the metacone bear  
388 prominent ribs and are divided by a narrow groove from each other. A crista is  
389 present on the lingual surface of the paracone. Both the parastyle and the metastyle  
390 are distinct. However, the former is larger and slightly lower than the latter. The  
391 protocone is directly lingual to the paracone, extending the protoloph anterobuccally  
392 to join the preparacrista near the parastyle in a high position. Another ridge  
393 (endoprotocrista) extends posterobuccally from the protocone with a relatively sharp  
394 angle, bypassing the metaconule. The metaloph incorporates the metaconule and is  
395 transversely extended and sharp, joining the ectoloph and endoprotocrista in  
396 relatively high positions. A weak cingulum is continuous on the anterior, lingual,  
397 and posterior sides, and is discernable buccal to the metacone.

398 P4 (Fig. 6a): The tooth is similar to P3 in morphology except that the paracone  
399 and metacone are widely separated with the metacone slightly more lingually placed.  
400 The paracone and metacone ribs are divided by a wide, triangular trough, and that  
401 the parastyle is larger and relatively higher.

402 M1-2 (Fig. 6a): The M1 and M2 are similar in morphology, although the  
403 parastyle and hypocone of M1 are broken off. The tooth is nearly quadrate in outline  
404 with relatively high, sharp lophs, which are partially related to its lightly worn  
405 condition. The paracone is high and pinched on the buccal side, with a nearly  
406 vertical, weak crista on the lingual side. The metacone is slightly lower than the

407 paracone, strongly lingually depressed with a distinct rib on the buccal surface, and  
408 bears a relatively long postmetacrista. The parastyle is large, expanded, and situated  
409 anterior to the paracone. The protocone is roughly lingual to the paracone, extending  
410 the slightly anterior-arched protoloph toward the parastyle and then joining the  
411 preparacrista. The hypocone is as large as the protocone, and the metaloph is  
412 straighter and shorter than the protoloph, almost joining the top of the ectoloph close  
413 to (on M1) or slightly anterior to (on M2) the apex of the metacone. A thin but  
414 distinct cingulum is continuous on the anterior, lingual, and posterior sides. A weak  
415 cingulum is discernable on the buccal side of the metacone and between the  
416 paracone and the parastyle.

417 M3 (Fig. 6a): The tooth is trapezoid in outline with a truncated posterobuccal  
418 part. The metacone is much reduced with a short postmetacrista, which is slightly  
419 buccally flared. The metacone rib is absent on the buccal surface. The parastyle is  
420 relatively more buccally placed than that of M2. The metaloph is slightly anteriorly  
421 arched and joins the top of the metacone. The cingulum is partially broken off or  
422 imbedded in the socket, but probably similar to that of M2.

423 The fragmentary symphyseal region of the mandible preserves the roots of three  
424 lower incisors and a slightly larger canine, which are closely placed to each other  
425 (Fig. 6b). The cross sections of the incisor roots are rounded, but that of the canine is  
426 laterally compressed oval. Based on the alveoli of anterior teeth, it is reasonable to  
427 infer that i2 is larger than i1, which is in turn slightly larger than i3.

428 p1: This tooth only preserves the single root, which is oval in cross section (Fig.  
429 6c).

430 p2 (Fig. 6c-d): The tooth is elongated anteroposteriorly with a main protoconid  
431 placed in the middle. The paracristid extends anteriorly and slightly buccally from  
432 the protoconid, and then curves lingually in a low position. Two ridges descend  
433 posteriorly from the protoconid: the buccal one is indistinct and joins the cristid  
434 obliqua, whereas the lingual one is more prominent. The hypoconid is large but

435 lower than the protoconid, extending the cristid obliqua anteriorly with a vertical  
436 buccal surface and a sloped lingual surface. The entoconid is absent. A weak  
437 cingulid is discernable at the lingual base of the talonid. (p2: L=8.3 mm, W≈3.7 mm,  
438 V 26252)

439 p3 (Fig. 6c-d): The tooth is elongated anteroposteriorly with the talonid wider  
440 and as long as the trigonid. The trigonid is longer than wide, whereas the width of  
441 the talonid is slightly greater than the length. The paracristid descends anteriorly and  
442 slightly buccally from the protoconid, and then curves lingually to a tiny paraconid,  
443 which forms a small hook from the rest of the paracristid. The metaconid is as large  
444 as the protoconid, and situated posterolingual to the latter. The protolophid is short  
445 and divided by a shallow notch. The cristid obliqua extends anteriorly and slightly  
446 lingually from the hypoconid to the posterior side of the protoconid at mid-height.  
447 The buccal surface of the cristid obliqua is vertical as in p2, whereas the lingual side  
448 forms a sloped surface with a faint rib extending lingually from the hypoconid. A  
449 weak ridge descends from the hypoconid along the posterior border of the talonid,  
450 and joins the lingual cingulid at the base of the talonid. A very small cuspid arises  
451 from the lingual cingulid foreshadowing the development of the entoconid. A weak  
452 cingulid is also present at the base of the ectoflexid. (p3: L=11.0 mm, W=6.1 mm, V  
453 26252)

454 Only a fragmentary p4 is preserved (Fig. 6e). The cristid obliqua extends from  
455 the hypoconid to the lingual side of the protoconid in a high position. The buccal  
456 cingulid is distinct and likely continuous.

457 Only fragmentary lower molars are preserved (Fig. 6f). However, it is  
458 reasonable to infer that the metaconid is posterolingually placed to the protoconid,  
459 resulting in an oblique protolophid, the cristid obliqua descends anteriorly from the  
460 hypoconid to the middle height of the protolophid, and that the buccal cingulid is  
461 present and probably continuous.

462

463 **Comments on *Ephyrachyus implicatus* (= *Triplopus implicatus*)**

464 Radinsky<sup>9</sup> assigned the following specimens to '*Triplopus*' *implicatus*: AMNH  
465 FM 2341, 2342 (holotype of '*Eotrigonias*' *petersoni*), 5074, 5075, 5078 (holotype of  
466 '*Ephyrachyus*' *implicatus*), 13194, and 13202; CM 9384, 18461-18464; UCMP  
467 69374-69376.

468 After checking other all available specimens and casts (except for casts of CM  
469 18416-18464) housed at the AMNH that were assigned to '*Triplopus implicatus*' by  
470 Radinsky<sup>9</sup>, following brief comments need to be addressed: 1) the lower check teeth  
471 of AMNH FM 5078, 5074, and CM 9384 are similar in size and morphology, and  
472 thus could be assigned to the species *Ephyrachyus implicatus*; 2) the M3 and p4-m2  
473 of UCMP 69374-39376 are very similar to those of AMNH FM 2341, 2342, and  
474 13202 except for a more distinct entoconid on p4, and they probably belong to  
475 *Triplopus petersoni*; 3) AMNH FM 13194 from the mid-late Uintan may represent a  
476 different species of *Triplopus*, characterized by a distinct entoconid on p4, short and  
477 anterolingually directed paralophids on p4-m3, and oblique hypolophids on m1-2.

478

479 *Hyrachyidae* Osborn, 1892

480 *Hyrachyus?* *tumidus* sp. nov.

481 **Holotype.** IVPP V 26253.1, a right maxilla with broken P3-M2.

482 **Locality and horizon.** Basal part of the Arshanto Formation, Nuhetingboerhe.

483 **Description.** A right maxilla preserves nearly complete P3, incomplete P4-M2, and  
484 roots of P1-2. The P1 bears two roots, and P2 has a triangular outline, suggesting a  
485 well developed protocone at the posterolingual side.

486 P3 (Fig. 6g): The parastyle, metacone and metaconule are partially broken. The  
487 tooth is rectangular in outline with the width greater than the length. The paracone  
488 and the metacone are closely placed, separated by a narrow groove on the buccal  
489 side. The buccal surfaces of the paracone and metacone are rounded and swollen  
490 rather than rib-like with the former slightly more convex. The parastyle is broken off.

491 The protoloph joins the ectoloph in a relatively high position and swings posteriorly  
492 passing the metaconule. Although the metaconule is nearly completely damaged, its  
493 low lingual end dies out before reaching the protoloph, resulting in a posterior outlet  
494 for the median valley. The cingulum is distinct and continuous around the anterior,  
495 lingual, and posterior sides, although the lingual cingulum is partially broken.  
496 Buccal to the metacone, there is also a weak cingulum at the base.

497 P4 (Fig. 6g): The lingual half of the tooth is broken off, and the buccal surface  
498 of the paracone is damaged. The paracone and metacone are more separated than  
499 those on P3. A crista is present at the base of the lingual surface of the paracone.  
500 The parastyle is somewhat pinched, relatively high, and anterobuccal to the  
501 paracone. The protoloph connects to the ectoloph in a high position as in P3. The  
502 metaconule joins the ectoloph anterior to the metacone and slightly higher than the  
503 corresponding joint of the protoloph.

504 M1-2 (Fig. 6g): Both M1 and M2 are partially broken off. The following  
505 description combines their morphologies, assuming that they have similar  
506 morphologies to other *Hyrachyus*. The outline of the crown is roughly quadrate. The  
507 paracone is high and sharp with a strong rib on the buccal side. The metacone is  
508 lingually placed, slightly concave with a moderately long postmetacrista that is  
509 slightly buccally deflected. The metacone rib is distinct, but is weaker on M2 than  
510 that of M1. The parastyle is large (relatively larger on M2), fan-shaped, but is  
511 slightly separated from the paracone rather than closely appressed. The protoloph is  
512 considerably longer than the metaloph, which joins the ectoloph slightly anterior to  
513 the metacone. The posterior cingulum is distinct, but absent at the posterior and  
514 lingual sides of the hypocone. A weak buccal cingulum is present at the base of the  
515 metacone. The anterior and lingual cingula are unknown due to damage.

516 m1-2 (Fig. 6h-i): Only the trigonids of m1 and m2 are preserved, and they are  
517 probably from the same individual as the maxilla based on a similar degree of wear.  
518 The trigonid is roughly U-shaped with the transversely extended protolophid parallel

519 to the anterior branch of the paralophid. The buccal branch of the paralophid is  
520 anteriorly and slightly lingually oriented from the protoconid. The anterior branch of  
521 the paralophid is relatively long. The metaconid is somewhat conical and higher  
522 than the protoconid on the slightly worn m2. Based on the fragmentary cristid  
523 obliqua preserved on m1, it extends to the protolophid lingual to the protoconid, and  
524 joins the protolophid in a relatively low position. A weak cingulid is preserved at the  
525 anterobuccal corner and continues on the anterior side.

526

### 527 **Comments on other species of *Hyrachyus* from China**

528 *Hyrachyus neimongoliensis* from the Arshanto Formation in the Erlian Basin<sup>20</sup>  
529 is known from a fragmentary skull with P3-M3 (IVPP V 5721), and Huang and  
530 Wang<sup>11</sup> have argued its probable affinity with amynodontids. Although Qi<sup>20</sup>  
531 assigned it to *Hyrachyus*, he also noticed that its cranial morphology and size  
532 resembles those of *Pappaceras confluens* (= *Forstercooperia huhebulakensis*)<sup>21,22</sup>;  
533 furthermore, a relatively long distance between the postglenoid process and the  
534 occipital condyle (about 20% of the skull length) and a possible shallow preorbital  
535 fossa according to the figure (Qi<sup>20</sup>, fig. 29) suggest that IVPP V 5721 is more similar  
536 to *Pappaceras* than to *Hyrachyus*<sup>21</sup>. IVPP V 5721 is also different from *Hyrachyus*  
537 but similar to *Pappaceras* in the presence of the antecrochet on M1 (as in *P.*  
538 *confluens* and *P. meiomenus*), flat and straight metacones on M1-2, and relatively  
539 pinched parastyles on M2-3 (Qi<sup>20</sup>, fig. 29). The length of the molar series (about  
540 77.0 mm) and less reduced M3 metacone of IVPP V 5721 suggest that it is more  
541 similar to *P. minutus* or *P. meiomenus* than to *P. confluens*<sup>21,23,24</sup>. As a result,  
542 without access to IVPP V 5721, we consider ‘*Hyrachyus neimongoliensis*’ likely to  
543 be a synonym of *Pappaceras minutus* or *P. meiomenus*. If the latter case is true, the  
544 specific name *P. neimongoliensis*<sup>20</sup> has priority over *P. meiomenus*<sup>24</sup>.

545 Qi<sup>20</sup> also assigned a left M3 (IVPP V 5728) to *Hyrachyus* cf. *H. eximus* from the  
546 Arshanto Formation at Huheboerhe. But the M3 has an inverted U-shaped ridge

547 composed of the protoloph, ectoloph, and metaloph, and a highly reduced metacone  
548 situated in the midway of the metaloph, suggesting that it is more probably assigned  
549 to deperetellid *Irenolophus*<sup>25</sup>.

550 Upper molars of *Hyrachyus tongi* from the Hedi Formation in the Yuanqu  
551 Basin<sup>11</sup> are more similar to those of *Triplopus* than to *Hyrachyus* in having reduced,  
552 pillar-like parastyles, concave metacone without metacone ribs, protocone situated  
553 directly lingual to the paracone, an antecrochet on M1, and metacone of M3 very  
554 short, more lingually depressed and lingually directed. Furthermore, among  
555 *Triplopus*, '*Hyrachyus*' *tongi* most resembles *T. rhinocerinus* in having molarized  
556 P2, incipient separation between the protocone and hypocone on P3 and P4 (more  
557 distinct on P4), and the metaconule of P3-4 contacting the protoloph and enclosing  
558 the medifossette<sup>9,26</sup>. However, '*Hyrachyus*' *tongi* can be mainly distinguished from  
559 *T. rhinocerinus* by a slightly less molarized P2 and the junction between the  
560 metaconule and the crista on P3-4, resulting a small pit<sup>11</sup>. As a result, we consider  
561 '*Hyrachyus*' *tongi* to be more reasonably assigned to *Triplopus tongi*.

562 Chow and Qi<sup>18</sup> named *Hyrachyus metalophus* from the Guanzhuang Formation  
563 in Xintai, Shandong Province. *Hyrachyus metalophus* is mainly different from  
564 *Ephyrachyus woodi* in its larger size, prominent metacone ribs and smaller  
565 parastyles on M1-3, cristid obliqua of p3-4 oriented to the midpoint of the  
566 protolophid, and cristid obliqua of lower molars more developed. However, the  
567 more lingually directed cristid obliqua from p2 to p4, as a diagnosis character of *H.*  
568 *metalophus*, is also seen in *H. eximius* (AMNH FM 1645)<sup>7</sup>. Chow and Qi<sup>18</sup> also  
569 tentatively assigned several maxilla and mandibles (IVPP V 6391, 6392) from the  
570 same locality to *Hyrachyus modestus*?. However, the U-shaped ridge formed by the  
571 protoloph, ectoloph, and metaloph on M2 with a relatively reduced metacone, highly  
572 reduced paralophs and cristid obliquae on m1-3, and the tops of the protolophs and  
573 hypolophs posteriorly curved on m3 suggest that these specimens more likely  
574 belong to deperetellid tapiroids<sup>2</sup>.

575 **Common synapomorphic characters of some clades**

576 The Tapiridae-Deperetellidae clade (Fig. 7, node G) in the most parsimous tree  
577 is supported by following common synapomorphic characters (Supplementary Table  
578 1): P3 postprotocrista absent (49:0, character and state), P3 metaloph joining the  
579 ectoloph in a high position and slightly anterior to the apex of the metacone (51:2),  
580 P3 semimolariform without the lingual ridge or molariform (53:3, 5), P4  
581 postprotocrista absent (75:0), P4 semimolariform without the lingual ridge or  
582 molariform (80:3, 5), M1-2 metacone strongly lingually displaced compared to the  
583 paracone (103:2), p4 trigonid shorter than the talonid (196:0), p4 cristid obliqua  
584 high and composed of two ridges (208:2), the orientation of basioccipital nearly  
585 horizontal (286:1), and the height of the mandibular corpus constant (349:0).

586 The Paraceratheriidae-Rhinocerotidae clade (Fig. 7, node S) in the most  
587 parsimonious tree is supported by the following common synapomorphic characters  
588 (Supplementary Table 1): the buccal surface of M1-2 paracone broadly convex  
589 (98:0), the postcanine diastema length 50–100% of m1 length (149:1), and position  
590 of metaconid slightly more posteriorly displaced related to the protoconid on p3  
591 (183:1).

592 The clade (Fig. 7, node P), comprising Amynodontidae and the  
593 *Eggysodon*-Paraceratheriidae-Rhinocerotidae clade, in the most parsimonious tree  
594 is supported by the following common synapomorphic characters (Supplementary  
595 Table 1): P4 metaloph posterolingually extended (83:2), M1-2 paracone somewhat  
596 lingually slanted (99:1), p3 hypolophid lophid and distinctly lower than protocristid  
597 (190:3), p4 anterior branch of the paracristid shorter than the buccal branch (200:0),  
598 p4 hypolophid either weak, curving along the posterior border or lophid and  
599 distinctly lower than protocristid (212:2, 3), m1-2 lingual cingulid incomplete  
600 (215:1), and m3 lingual cingulid present but incomplete (246:1) (Supplementary  
601 Table 1).

602

603



604 **Supplementary Note 2.**

605 **Character list**

606 Most characters and states are new, and some are derived or modified from previous  
607 researchers, including H89: Hooker<sup>6</sup>; H94: Hooker<sup>27</sup>; BB95: de Bonis et al.<sup>28</sup>; DH97:  
608 Dashzeveg and Hooker<sup>5</sup>; H01: Holbrook<sup>29</sup>; A02: Antoine<sup>30</sup>; F02: Froehlich<sup>31</sup>; HD03:  
609 Hooker and Dashzeveg<sup>32</sup>; HD04: Hooker and Dashzeveg<sup>33</sup>; C05: Colbert<sup>34</sup>; AA07:  
610 Anquetin et al.<sup>35</sup>; M08: Muhlbachler<sup>36</sup>; H09: Holbrook<sup>37</sup>; B10: Bai et al.<sup>38</sup>; H10:  
611 Hooker<sup>39</sup>; CD12: Chen et al.<sup>40</sup>; KL12: Kondrashov and Lucas<sup>41</sup>; DR13: Danilo et  
612 al.<sup>42</sup>; RH14: Rose et al.<sup>43</sup>; RR15: Robinet et al.<sup>44</sup>; and W16: Wang et al.<sup>24</sup>.

613

614 **Dental characters**

615 **Upper Dentitions**

616 **Upper Incisors**

- 617 1. Number of upper incisors: (0) 3; (1) 1 (I1).
- 618 2. Upper incisor relative sizes: (0) approximately equal in size; (1) enlarged from  
619 I3 to I1; (2) gradually increased from I1 to I3; (3) I3 considerably larger than I1  
620 and I2, (4) I2 the largest.
- 621 3. Incisors shape: (0) spatulate; (1) I3 pointed, I1-2 spatulate; (2) all pointed; (3)  
622 I1 chisel-like, I2-I3 reduced or absent; (4) I1 hypertrophied and conical, I2-3  
623 reduced or absent.
- 624 4. Arrangement of upper incisors: (0) loosely arranged and evenly distributed, (1)  
625 closely arranged.
- 626 5. Upper incisors: (0) arched, (1) converging anteriorly and forming an acute  
627 angle, nearly anteroposteriorly displaced.

628

629 **Upper Canine**

- 630 6. Upper canine size: (0) medium, larger than the incisors, (1) small, comparable  
631 to or even smaller than incisors, (2) large, considerably larger than incisors, (3)

632 hypertrophied, (4) absent.

633 Most amynodontids have hypertrophied upper canines (state 3), while *Heptodon*,  
634 *Pappaceras*, *Forstcooperia*, and a few amynodontids have large upper canines (state  
635 2), which are relatively smaller than the size of hypertrophy.

636 7. Postcanine diastema: (0) short, (1) long, (2) absent. (RH14:105; H09:28)

637 As suggested by Holbrook (2009), if the postcanine diastema is not much  
638 longer than P1, it is coded as state 0 (short).

639

640 **P1**

641 8. P1: (0) present; (1) absent. (DR13:8; F02:20; H89:11; HD04:20; RR15:1)

642 9. Post P1 diastema: (0) present; (1) absent. (modified from H10:44; HD04:52)

643 10. P1 root: (0) single; (1) double; (2) three.

644 11. P1 elongation: (0) shorter than P2; (1) as long as or longer than P2. (DR13:9)

645 12. P1 posterolingual cusp (protocone or hypocone): (0) absent; (1) present.  
646 (C05:28; DH97:17)

647 Dashzeveg and Hooker (1997) referred to a large posterolingual cusp of P1 as a  
648 hypocone, however, its homology with the protocone could not be excluded. For  
649 convenience, we use posterolingual cusp instead of hypocone.

650 13. P1 metacone: (0) absent; (1) present.

651 14. P1 protoloph: (0) absent; (1) rudimentary and cingulum-like; (2) prominent and  
652 loph-like.

653 15. P1 metaloph (or metaconule): (0) absent, (1) present.

654

655 **P2**

656 16. P2: (0) longer than wide; (1) wider than long. (AA07:37; CD12:42)

657 17. P2 occlusal outline: (0) oval; (1) triangular, tapering forward; (2) subtriangular,  
658 anterior side slightly slanted; (3) rectangular. (modified from DR13:11)

659 18. P2 metacone: (0) absent or indistinct; (1) present, small, close to paracone; (2)

- 660 present, as large as and appressed to the paracone; (3) present, about as large as  
661 and separate from the paracone. (modified from H09:30; RH14:111)
- 662 19. P2 metacone position relative to the paracone: (0) posteriorly; (1)  
663 posterolingually.
- 664 20. Buccal surface of P2 paracone: (0) nearly flat; (1) conical; (2) broadly swollen;  
665 (3) rib-like.
- 666 21. Buccal surface of P2 metacone: (0) nearly flat; (1) conical; (2) broadly swollen.
- 667 22. P2 parastyle size: (0) absent; (1) less than the half of the paracone; (1) at least  
668 equal to the half of the paracone.
- 669 23. P2 metastyle: (0) absent; (1) present.
- 670 24. P2 protocone: (0) weak or absent; (1) prominent. (B10:3; H10:54)
- 671 25. Position of P2 protocone: (0) posterior, (1) on transverse axis, (2) anterior.  
672 (modified from B10:4)
- 673 26. P2 protoloph (or protoconule): (0) absent, (1) weak and low, (2) distinct and  
674 low, (3) prominent and high.
- 675 When the protoloph is cingulum-like as in *Protorohippus*, the protoloph was  
676 considered as being weak and low (state 1). When the protoloph is ridge-like but  
677 still in a relatively low position as in *Homogalax*, it is coded as being distinct and  
678 low (state 2).
- 679 27. Orientation of P2 protoloph (or the preparaconule crista) on the buccal side: (0)  
680 toward the lingual base of the paracone, (1) toward the anterolingual side of the  
681 paracone, (2) toward the preparacrista, (3) toward parastyle.
- 682 28. P2 postprotocrista: (0) absent, (1) present.
- 683 29. P2 hypocone: (0) absent; (1) present.
- 684 30. P2 protocone and hypocone: (0) fused, (1) incipient and separated from the  
685 protocone, (2) moderately separated, (3) completely separated (modified from  
686 A02:94)
- 687 As in *Teletaceras*, the protoloph extends posteriorly from the protocone with the

688 hypocone completely fused (state 0). In some taxa as *Colodon*, the protocone and  
689 hypocone are closely appressed and separated by a lingual groove (state 1). In *Juxia*,  
690 the protocone and hypocone are distinctly separated, but the middle valley is still  
691 closed (state 2). In *Trigonias* and *Subhyracodon*, the protocone and hypocone are  
692 completely separated and the middle valley is open (state 3).

693 31. P2 hypocone position related to the protocone: (0) posteriorly, (2)  
694 posterolingually, (1) posterobuccally.

695 32. P2 metaloph (or metaconule): (0) absent; (1) present, extending toward  
696 protocone, (2) present, extending toward hypocone (or posterior end of  
697 protocone), (3) much shorter and separated from the protoloph.

698 33. P2 metaloph (or metaconule) buccal extension: (0) low; (1) high.

699

#### 700 **P3**

701 34. P3 lingual cingulum: (0) complete; (1) broken or absent. (C05:30)

702 35. Position of parastyle related to the paracone of P3: (0) anteriorly; (1) slightly  
703 anterobuccally; (2) strongly anterobuccally; (3) anterolingually.

704 36. P3 paracone and metacone: (0) well separate, (1) close together, (2) very close.  
705 (modified from HD04:51; B10:7)

706 37. P3 metacone position relative to the paracone: (0) posteriorly, (1)  
707 posterolingually. (RH14:132)

708 38. Buccal surface of P3 paracone: (0) nearly flat; (1) convex; (2) rib-like; (3)  
709 slightly convex.

710 39. Buccal surface of P3 metacone: (0) nearly flat; (1) convex; (2) rib-like; (3)  
711 slightly convex.

712 40. P3 parastyle: (0) less than the half of the paracone; (1) at least equal to the half  
713 of the paracone. (modified from RR15:19)

714 41. P3 metastyle: (0) absent or weak; (1) present.

715 42. Orientation of P3 postmetacrista: (0) posteriorly; (1) slightly posterobuccally;

- 716 (2) considerably posterobuccally.
- 717 43. P3 crista: (0) absent, (1) present.
- 718 44. Position of P3 protocone: (0) posterior, (1) on transverse axis, (2) anterior.
- 719 45. P3 paraconule: (0) present in the middle of the protoloph; (1) present and  
720 lingually positioned; (2) absent or indistinct. (modified from RH14:116)
- 721 In some advanced ceratomorphs (e.g., *Triplopus*, *Prohyracodon*, *Juxia*) the  
722 paraconules are merged with the protolophs, and are not demarcated from the latter  
723 (state 2).
- 724 46. Connection between protocone and paraconule: (0) notched; (1) loph or slightly  
725 notched; (2) completely separated.
- 726 In *Deperetella* the paraconule is completely separated from the protocone (state  
727 2).
- 728 47. Orientation of P3 protoloph (or the preparaconule crista) on the buccal side: (0)  
729 toward the lingual or anterolingual base of the paracone; (1) toward parastyle;  
730 (2) toward the preparacrista and parastyle junction; (3) midway of preparacrista;  
731 (4) toward paracone
- 732 48. P3 endoprotocrista: (0) absent; (1) present.
- 733 49. P3 postprotocrista: (0) absent, (1) present.
- 734 50. P3 metaconule: (0) present (1) absent or indistinct. (modified from RH14:119)
- 735 In some taxa (e.g., *Triplopus*, *Prohyracodon*, *Juxia*) the metaconules are merged  
736 with the metalophs, and are not demarcated from the latter (state 1).
- 737 51. P3 metaloph (or premetaconule crista) joins the ectoloph: (0) low, at the base of  
738 the anterolingual side of the metacone; (1) low, at the base of lingual side of the  
739 metacone; (2) high, slightly anterior to the apex of the metacone;
- 740 52. P3 hypocone: (0) absent; (1) present.
- 741 In *Metamynodon*, the metaconules is elongated and forms the posterior  
742 transverse loph, which is partially or completely separated from the protoloph.  
743 However, the hypocone is still absent on P3 of *Metamynodon* (state 0).

744 53. Degree of P3 molarization: (0) unmolariform; (1) premolariform; (2)  
745 submolariform; (3) semimolariform without the lingual ridge; (4)  
746 semimolariform with the lingual ridge; (5) molariform. (modified from  
747 A02:102)

748 54. P3 hypocone position related to the protocone: (0) posteriorly; (1)  
749 posterolingually; (2) posterobuccally.

750 55. P3 metaloph (or metaconules) orientation when a hypocone present: (0)  
751 hypocone; (1) protocone.

752 This character is somewhat similar to the character 19 of Dashzeveg and  
753 Hooker (1997), and the character state 1 was used as a synapomorphy of  
754 *Desmatotherium* and *Dilophodon*.

755 56. P3 metaloph (or metaconules) orientation: (0) nearly transversely extended; (1)  
756 posterolingually extended; (2) anterolingually extended

757 **P4**

758 57. P4 occlusal outline: (0) triangular, (1) subquadrangular, (2) square or  
759 rectangular. (DR13:20)

760 58. P4 lingual cingulum: (0) with reduced on the protocone or absent; (1) present  
761 and continuous. (modified from DR13:21).

762 59. Orientation of P4 preparacrista: (0) anteriorly; (1) slightly anterobuccally; (2)  
763 strongly anterobuccally; (3) anterolingually extended.

764 60. P4 paracone and metacone: (0) closely placed; (1) moderately separated; (2)  
765 widely separated.

766 61. P4 metacone situated relative to the protocone: (0) posteriorly; (1) slightly  
767 posterolingually; (2) strongly posterolingually. (RH14:132, with additional  
768 character state)

769 In *Schlosseria* and *Lophialetes*, the metacone is strongly lingually displaced  
770 related to the paracone (state 2).

771 62. The buccal surface of P4 paracone: (0) convex; (1) rib-like; (2) slightly convex.

- 772 63. The buccal surface of P4 metacone: (0) nearly flat; (1) convex; (2) rib-like; (3)  
773 slightly convex.
- 774 64. P4 paracone: (0) vertically implanted; (1) slightly lingually inclined; (2)  
775 considerably lingually inclined.
- 776 65. P4 parastyle: (0) less than the half of the paracone; (1) at least equal to the half  
777 of the paracone. (modified from RR15:19)
- 778 66. P4 metastyle: (0) absent or indistinct; (1) present.
- 779 67. Orientation of P4 postmetacrista: (0) posteriorly; (1) posterobuccally.
- 780 68. P4 crista: (0) absent, (1) present.
- 781 69. Position of P4 protocone: (0) on transverse axis; (1) anterior; (2) posterior.  
782 (modified from B10:4)
- 783 70. P4 protocone: (0) vertically implanted, (1) slightly buccally slanted; (2)  
784 considerably buccally slanted.
- 785 71. P4 paraconule: (0) large and distinct, (1) small, (2) absent. (modified from  
786 RH14:124; KL12:7, in part)
- 787 72. Connection between protocone and paraconule: (0) loph or slightly notched; (1)  
788 notched; (2) completely separated
- 789 73. Orientation of P4 protoloph (or the preparaconule crista) on the buccal side: (0)  
790 toward the lingual or anterolingual base of the paracone; (1) toward parastyle;  
791 (2) toward the preparacrista and parastyle junction; (3) midway of preparacrista;  
792 (4) toward paracone.
- 793 74. P4 endoprotocrista: (0) absent; (1) present.
- 794 75. P4 postprotocrista: (0) absent; (1) present.
- 795 76. P4 metaconule: (0) similar in size to paraconule; (1) present, small; (2) absent  
796 or indistinct.
- 797 77. P4 metaloph (or metaconule) joins the ectoloph: (0) low, at the base of  
798 lingual side of the metacone; (1) low, at the base of the anterolingual side of the  
799 metacone; (2) high, nearly at the apex of the metacone; (3) high, towards the

800 middle of the centrocrista.

801 78. P4 endometacrista: (0) absent; (1) present. (RR15:32)

802 In *Homogalax* and *Isectolophus*, a ridge on the lingual surface of the metacone  
803 connects the apex of the metacone and metaloph, which is displaced at the base of  
804 the metacone (state 1).

805 79. P4 hypocone: (0) absent; (1) present. (RH14:131, in part)

806 80. Degree of P4 molarization: (0) unmolariform; (1) premolariform; (2)  
807 submolariform; (3) semimolariform without the lingual ridge; (4)  
808 semimolariform with the lingual ridge; (5) molariform.

809 81. P4 hypocone position related to the protocone: (0) posterior; (2)  
810 posterolingually; (1) posterobuccally.

811 82. P4 metaloph (or metaconules) orientation when a hypocone present: (0)  
812 hypocone; (1) protocone.

813 83. P4 metaloph (or metaconules) orientation: (0) anterolingually extended; (1)  
814 nearly transversely extended; (2) posterolingually extended. (similar to  
815 A02:103)

816

817 **M1-2**

818

819 84. Upper molar buccal and lingual cusp outer walls converge at: (0) between 90°  
820 and 100°, (1) at less than 90°. (modified from H94:12; F02:65)

821 85. Upper molar (M1-2) ectocingulum: (0) present and continuous; (1) interrupted  
822 at the paracone, forming a ridge and marginal adjacent to the metacone; (2)  
823 present adjacent to metacone, bulbous and encroaching on styler shelf; (3)  
824 absent or very weak. (modified from DH97:12, C05:24, RH14:135)

825 86. Upper molar lingual cingulum: (0) relatively complete (1) interrupt at the  
826 protocone; (2) interrupt at the hypocone, (3) restricted to the medivallum, (4)  
827 absent. (modified from C05:23)



- 828 87. Upper molar lingual margins of paracone and metacone: (0) rounded; (1) nearly  
829 flat; (2) with a crista. (M08:62, in part)
- 830 88. M1 length and width ratios: (0) wider than long; (1) roughly as long as wide; (2)  
831 longer than wide.
- 832 89. M2 length and width ratios: (0) wider than long; (1) roughly as long as wide; (2)  
833 longer than wide.
- 834 90. Orientation of M1-2 preparacrista: (0) anteriorly; (1) anterobuccally; (2)  
835 anterolingually.
- 836 91. M1-2 centrocrista: (0) present, straight, (2) present, slightly flexed buccally.  
837 (modified from H94:10, HD03:10, HD04:10, H09:36, H10:9, B10:25,  
838 RH14:137,)
- 839 92. Those with straight centrocrista: (0) contacting the posterolingual side of the  
840 paracone; (1) contacting the posterior side of the paracone, thus forming a  
841 U-shaped ectoloph.
- 842 In *Colodon occidentalis* and deperetellids, the centrocrista contacts the posterior  
843 side of the paracone instead of posterolingual side of the paracone, and marked by a  
844 shallow notch; thus, the ectoloph is inverted U-shaped (state 1).
- 845 93. M1-2 parastyle morphology: (0) small and low; (1) moderate to large  
846 fan-shaped; (2) pillar or rib-like. (modified from H09:42, RH14:150)
- 847 94. Those with pillar or rib-like parastyle with groove separating the paracone  
848 (parastyle fold): (0) narrow, (1) wide and open.
- 849 95. M1-2 parastyle: (0) separated from the paracone; (1) closely compressed to the  
850 paracone. (modified from C05:11, DH97:7)
- 851 96. M1 parastyle position related to the paracone: (0) anterior; (1) anterobuccal; (2)  
852 anterolingual.
- 853 97. M2 parastyle position related to the paracone: (0) anterior; (1) anterobuccal; (2)  
854 anterolingual.
- 855 98. The buccal surface of M1-2 paracone: (0) broadly convex; (1) pinched.

- 856 99. M1-2 paracone: (0) vertically implanted; (1) somewhat lingually slanted, (2)  
857 distinctly lingually slanted.
- 858 100. Upper molar mesostyle: (0) absent; (1) variably developed by forming a ridge  
859 on the buccal wall between paracone and metacone; (2) small cingulum-like  
860 (modified from H94:11)
- 861 101. Buccal surface of M1-2 metacone: (0) nearly flat; (1) convex; (2) rib-like; (3)  
862 slightly convex (C05:8; similar to RH14:141, but with different states)
- 863 102. M1-2 metacone: (0) vertically implanted; (1) tilted lingually slightly; (2) tilted  
864 lingually strongly. (modified from DH97:5, HD04:44, B10:23)
- 865 103. M1-2 metacone position compared with paracone: (0) slightly lingually  
866 displaced; (1) distinctly lingually displaced, (2) strongly lingually displaced; (3)  
867 posteriorly displaced.
- 868 If the metacone is lingually inclined, the relative position of the metacone to  
869 the paracone moves buccally during wear. Thus, this character is determined based  
870 on the slightly worn specimens.
- 871 104. M1-2 postmetacrista: (0) short; (1) relatively long; (2) distinctly long; (3)  
872 reduced to a ridge or almost absent. (modified from DH97:15, C05:27)
- 873 If the postmetacrista is considerably shorter than the distance between paracone  
874 and metacone on slightly worn M1-2, it is coded as short (state 0).
- 875 105. Orientation of M1 postmetacrista: (0) posteriorly; (1) slightly posterobuccally;  
876 (2) considerably posterobuccally. (modified from RH14:143, in part)
- 877 106. Orientation of M2 postmetacrista: (0) posteriorly; (1) slightly buccally  
878 deflected; (2) strongly buccally deflected.
- 879 107. M1-2 paraconule: (0) large and distinct; (1) small or indistinct, (2) absent.  
880 (RH14:146, in part);
- 881 108. The paraconule position: (0) midway between paracone and protocone; (1)  
882 closer to protocone, (2) closer to paracone. (RH14:147, in part)
- 883 109. M1-2 preparaconule crista orientation toward: (0) preparacrista; (1) curved

884 towards the paracone without a break.

885 110. M1-2 protoloph (or the preparaconule crista) on the buccal side: (0) low,  
886 separate from the ectoloph by a groove; (1) low and unnotched; (2) high  
887 (modified from F02:54, H10:2, DR13:36)

888 111. M1-2 preprotocrista: (0) slightly notched, (1) complete. (modified from  
889 F02:45)

890 112. M1-2 antecrochet: (0) absent; (1) present and weak; (2) present and prominent.

891 If there is groove between the protocone and the antecrochet on the posterior  
892 surface of the protoloph as in *Hyracodon* and *Teletaceras*, the character state is  
893 coded as “present and prominent” (state 2). If the protocone and the antecrochet are  
894 generally continuous on the posterior surface of the protoloph as in *Amyrnodon*, the  
895 character state is coded as “present and weak” (state 1).

896 113. M1-2 protocone lingual surface: (0) nearly vertical; (1) moderately buccally  
897 tilting; (2) strongly buccally tilting.

898 114. M1-2 protocone position: (0) directly lingual to the paracone; (1) posterior to  
899 the paracone, closer to the paracone than to the mesostyle (or the middle point  
900 of the centrocrista); (2) anterior to the paracone.

901 115. M1-2 metaloph (or premetaconule crista) joins the ectoloph: (0) low, near the  
902 base of the metacone; (1) high, nearly at the apex of the metacone; (2) high,  
903 considerably anterior to the metacone, even towards the middle of the  
904 centrocrista;

905 In Lophialetidae (*Schlosseria*, *Lophialetes*, *Eoletes*, *Kalakotia*), the metaloph  
906 contacts the ectoloph distinctly anterior to the metacone, nearly at the middle point  
907 of the centrocrista (state 2), while in most ceratomorphs the metaloph contacts the  
908 ectoloph near the apex of the metacone (state 1). This character can only be  
909 determined in slightly-worn teeth, because as wear progresses, the metaloph and  
910 ectoloph junction can be changed as, for example, in the M3 of *Moropus elatus*  
911 (Coombs, 1978).

- 912 116. M1-2 metaconule: (0) present; (1) very small; (2) indistinct or absent.  
913 (modified from RH14:148)
- 914 117. M1-2 metaloph: (0) extremely oblique; (1) transverse to slightly oblique.  
915 (B10:22; H10:35, in part; F02:58 in part)
- 916 118. M1-2 crochet: (0) absent, (1) present.
- 917 119. Metaconal fold: (0) present; (1) absent. (H10:32)
- 918
- 919 **M3**
- 920 120. M3 outline: (0) quadrilateral; (1) roughly square; (2) triangular.
- 921 121. M3 parastyle position related to the paracone: (0) anterior; (1) slightly  
922 anterobuccal; (2) strongly anterobuccal; (3) anterolingual.
- 923 122. M3 parastyle: (0) aligned with those on M1-M2, (1) projecting strongly  
924 buccally. (modified from HD04:43)
- 925 123. M3 parastyle: (0) not recurved; (1) posteriorly recurved. (HD04:42, H09:44,  
926 B10:14, RH14:152)
- 927 124. M3 mesostyle: (0) absent; (1) small, cingulum-like.
- 928 125. M3 metacone: (0) as large as the paracone; (1) somewhat smaller than the  
929 paracone, but still distinct; (2) vestigial; (3) absent, confluent with ectoloph and  
930 metaloph.
- 931 126. M3 metacone position: (0) equivalent to M2 position, (1) lingually shifted  
932 relative to M2 metacone position, (2) shifted buccally. (modified from RR15:67,  
933 F02:61, H09:48)
- 934 127. M3 postmetacrista: (0) short; (1) long; (2) reduced to a ridge; (3) absent.  
935 (modified from DH97:15, C05:27, F02:62)
- 936 128. Orientation of M3 postmetacrista: (0) posteriorly; (1) buccally deflected; (2)  
937 posterolingually.
- 938 129. M3 paraconule: (0) large and distinct; (1) small or indistinct, (2) absent.  
939 (RH14:146, in part)

- 940 130. M3 paraconule position: (0) midway between paracone and protocone; (1)  
941 closer to protocone. (modified from RH14:147, in part)
- 942 131. M3 preparaconule crista orientation toward: (0) preparacrista; (1) curved  
943 towards the paracone.
- 944 132. M3 protoloph (or the preparaconule crista) on the buccal side: (0) low,  
945 separated from the ectoloph by a groove, (1) low and unnotched; (2) high.  
946 (modified from F02:54, H10:2, DR13:36,)
- 947 133. M3 Preprotocrista: (0) slightly notched, (1) complete. (modified from F02:45)
- 948 134. M3 protocone lingual surface: (0) vertical; (1) slightly buccally tilting; (2)  
949 strongly buccally tilting.
- 950 135. M3 protocone position: (0) directly lingual to the paracone; (1) posterior to the  
951 paracone, closer to the paracone than to the mesostyle (or the middle point of  
952 the centrocrista); (2) anterior to the paracone.
- 953 136. M3 metaconule: (0) present and relatively large; (1) small; (2) indistinct or  
954 absent. (modified from RH14:148, in part)
- 955 137. M3 hypocone position: (0) at about same level as protocone; (1) buccally  
956 shifted relative to protocone; (2) lingually shifted relative to protocone.  
957 (RH14:164, in part)
- 958 138. M3 metaloph: (0) transverse or slightly oblique; (1) extremely oblique.  
959 (modified from B10:22; H10:35, in part; F02:58 in part)
- 960 When the metaloph is nearly in line with the ectoloph and extends towards the  
961 paracone, it is also coded as oblique (state 1).
- 962 139. The degree of M3 metaloph confluence with the ectoloph: (0) absent, (1)  
963 moderate, (2) complete.

964

#### 965 **Lower Dentitions**

#### 966 **Lower incisors**

- 967 140. The number of lower incisors: (0) 3, (1) 2 (i1-i2), (2) only i1 present, (3) only

968 i2 present.

969 Only one pair of lower incisors was present in *Cadurcodon*, however, its  
970 homology with a particular incisor pair has not been clear. Considering that the  
971 primitive amynodonts *Rostriamynodon*, *Amynodon* and *Sharamynodon* have i2  
972 larger than other incisor, it is reasonable to deduce that the lower incisors of  
973 *Cadurcodon* are i2 (state 3).

974 141. Where three incisors are preserved, they are: (0) approximately equal in size, (1)  
975 enlarged from i3 to i1, (2) enlarged from i1 to i3, (3) i2 the largest, (4) i1 and i2  
976 equal insize, i3 much reduced

977 One specimen of *Homogalax protapirinus* (AMNH FM 131) shows that the  
978 lower incisors increase in size from i1 to i3 (state 2), which is in contrast to the  
979 subequal lower incisors as mentioned by Radisnksy (1963).

980 142. The arrangement of lower incisors: (0) loosely arranged, (1) closely arranged,  
981 (2) widely separated.

982 143. Lower incisors: (0) arched; (1) converging anteriorly and forming an acute  
983 angle.

984 144. Lower incisors shape: (0) spatulate; (1) i3 pointed; (2) all pointed; (3) i2  
985 tusk-like, i1-i3 reduced or absent, (4) i1 hypertrophied and conical, i2-3  
986 reduced or absent.

987 145. Posterior cusp on i3: (0) absent, (1) present. (RH14:168, H09:50)

988 146. i3-canine diastema: (0) present (1) absent.

989

#### 990 **Lower canine**

991 147. Lower canine: (0) present, (1) absent. (AA07:36, CD12:40, coding reversed)

992 148. Lower canine: (0) relatively large; (1) small; (2) hypertrophied.

993 149. Postcanine diastema length: (0) less than 50% of m1 length, (1) 50-100% of m1  
994 length, (2) 100-150% of m1 length, (3) >150% of m1 length. (H10:48)

995 In some taxa (e.g. *Colodon occidentalis*) the lower canines are absent, and the

- 996 diastema was measured between the last incisor and the first premolar.
- 997
- 998 **p1**
- 999 150. p1: (0) present; (1) absent. (HD04:32, C05:49)
- 1000 151. p1 root: (0) single; (1) double.
- 1001 152. p1 morphology: (0) simple with anterior and posterior ridges from the
- 1002 protoconid; (1) relatively complex with additional posterolingual ridge from the
- 1003 protoconid.
- 1004 153. Post p1 diastema: (0) longer than lower postcanine diastema, (1) shorter, (2)
- 1005 absent. (H10:45)
- 1006
- 1007 **p2**
- 1008 154. p2: (0) present, (1) absent. (BB95:35; AA07:48, coding reversed)
- 1009 155. p2 lingual cingulid: (0) absent; (1) incomplete, (2) complete.
- 1010 156. p2 buccal cingulid: (0) absent; (1) incomplete, present on the hypoflexid; (2)
- 1011 interrupted at the protoconid; (3) continuous, weak; (4) complete, strong.
- 1012 157. p2 posterolingual cingulid: (0) absent; (1) present and enclosing the lingual side
- 1013 of talonid.
- 1014 158. p2 paraconid: (0) absent, (1) present with paracristid, (2) distinct, relatively
- 1015 large and prominent; (3) paracristid forming loop enclosing anterior basin.
- 1016 (modified from RH14:171)
- 1017 159. p2 paraconid: (0) less than half the height of the protoconid; (1) more than half
- 1018 the height of the protoconid.
- 1019 160. p2 metaconid: (0) absent; (1) small and appressed to the protocone, (2) distinct,
- 1020 close to the protoconid; (3) distinct, widely separated from the protoconid.
- 1021 161. Length of p2 trigonid: (0) much longer than talonid, (1) as long as or shorter
- 1022 than talonid. (modified from M08:78)
- 1023 162. p2 protolophid orientation: (0) nearly transverse, (1) posterolingually, (2)

- 1024 anteroposteriorly
- 1025 163. p2 cristid obliqua contacting the trigonid (or protoconid): (0) low; (1) high.
- 1026 164. The orientation of p2 cristid obliqua: (0) toward the midpoint of the protolophid;
- 1027 (1) toward the protoconid; (2) closer to the protoconid than to metaconid; (3)
- 1028 toward the metaconid.
- 1029 165. p2 hypoconid: (0) small; (1) large, (2) absent.
- 1030 A hypoconid lower than half the height of the protoconid was coded as small
- 1031 (state 0). A hypoconid higher than half the height of the protoconid was coded as
- 1032 large (state 1).
- 1033 166. p2 hypconid position: (0) distocentral, (1) distobuccal. (RR15:77)
- 1034 167. p2 entoconid: (0) absent; (1) weak; (2) distinct.
- 1035 168. p2 hypolophid: (0) absent; (1) weak, curves lingually for a short distance; (2)
- 1036 weak, curves along the posterior border; (3) lophid and distinctly lower than
- 1037 protocristid; (4) lophid and approaching the protocristid.
- 1038 169. p2 talonid: (0) not broader than trigonid; (1) broader than trigonid.
- 1039
- 1040 **p3**
- 1041 170. p3 size: (0) comparable in size to m1, (1) distinctly smaller than m1. (modified
- 1042 from F02:71)
- 1043 171. p3 lingual cingulid: (0) absent; (1) incomplete; (2) continuous and weak; (3)
- 1044 complete.
- 1045 172. p3 buccal cingulid: (0) absent; (1) incomplete, present on the hypoflexid; (2)
- 1046 interrupted at the protoconid; (3) continuous, weak; (4) complete.
- 1047 173. p3 trigonid: (0) as long as the talonid; (1) longer than the talonid; (2) shorter
- 1048 than the talonid.
- 1049 174. p3 trigonid: (0) as long as wide; (1) longer than wide; (2) wider than long.
- 1050 175. p3 paraconid: (0) absent, (1) indistinct, confluent with paracristid, (2) distinct.
- 1051 176. p3 paraconid: (0) less than half the height of the protoconid; (1) more than half



- 1052 the height of the protoconid. (H10:28, similar to C05:50, DH:97:23, HD04:31,  
1053 HD03:31)
- 1054 177. p3 paraconid: (0) single cusped; (1) bifurcate.
- 1055 178. p3 buccal branch of the paracristid (paracristid I) orientation: (0) anteriorly; (1)  
1056 anteriorly and slightly lingually; (2) anterolingually; (3) anterobuccally.
- 1057 179. p3 metaconid: (0) absent; (1) very small; (2) slightly smaller; (3) large.  
1058 (modified from F02:69)
- 1059 180. p3 metaconid position: (0) close to protoconid; (1) separated. (similar to  
1060 RH14:174, F02:70)
- 1061 181. p3 protolophid orientation: (0) nearly transverse; (1) slightly oblique; (2)  
1062 considerably oblique.
- 1063 182. p3 protolophid: (0) notched; (1) lophid.
- 1064 183. Position of metaconid related to the protoconid on p3: (0) considerably more  
1065 posteriorly displaced; (1) slightly more posteriorly displaced; (2) transversely  
1066 displaced.
- 1067 184. The ridge on the buccal side of the protoconid of p3: (0) absent; (1) present and  
1068 smooth; (2) present with nodules.
- 1069 185. p3 cristid obliqua: (0) low but unreduced; (1) high; (2) high and composed of  
1070 two ridges; (3) low and reduced.
- 1071 In *Colodon*, *Telelophus*, and *Deperetella*, the cristid obliqua of p3 is composed  
1072 of two ridges: one extending from the hypoconid anteriorly and the other steep one  
1073 descending from the apex of the protoconid posteriorly (state 2). The two ridges join  
1074 at a distinct notch. In *Tapirus*, the cristid obliqua of p3 is highly reduced and joins  
1075 the posterior base of the protoconid (state 3).
- 1076 186. Orientation of p3 cristid obliqua: (0) toward the midpoint of the protolophid; (1)  
1077 towards protoconid; (2) closer to the protoconid than to metaconid; (3) towards  
1078 the metaconid.
- 1079 187. p3 hypoconid: (0) small; (1) large. (modified from RH14:176)

- 1080 188. p3 hypoconid position: (0) postero-central; (1) posterobuccal.
- 1081 189. p3 entoconid: (0) absent; (1) present, distinctly smaller than hypoconid; (2)
- 1082 present, comparable in size to hypoconid. (RH14:177)
- 1083 190. p3 hypolophid: (0) absent; (1) weak with a faint rib, or curves lingually for a
- 1084 short distance; (2) weak, curves along the posterior border; (3) lophid and
- 1085 distinctly lower than protocristid; (4) lophid and approaching the protocristid.
- 1086 191. p3 talonid: (0) not broader than trigonid; (1) broader than trigonid. (DH97:24,
- 1087 C05:52, in part)
- 1088 192. p3 postmetacristid: (0) absent; (1) present.
- 1089
- 1090 **p4**
- 1091 193. p4 size: (0) smaller than m1, (1) comparable in size to m1, (2) larger than m1.
- 1092 194. p4 lingual cingulid: (0) absent; (1) incomplete; (2) continuous and weak; (3)
- 1093 complete.
- 1094 195. p4 buccal cingulid: (0) complete (1) continuous, weak; (2) interrupted at the
- 1095 protoconid; (3) incomplete, present on the hypoflexid; (4) absent.
- 1096 196. p4 trigonid: (0) shorter than the talonid (1) as long as the talonid;; (2) longer
- 1097 than the talonid.
- 1098 197. p4 trigonid: (0) wider than long (1) as long as wide; (2) longer than wide.
- 1099 198. p4 paraconid: (0) less than half the height of the protoconid; (1) more than half
- 1100 the height of the protoconid. (H10:28, similar to C05:50, DH97:23, HD04:31,
- 1101 HD03:31)
- 1102 199. p4 buccal branch of the paracristid (paracristid I) compared with protolophid:
- 1103 (0) shorter; (1) as long as; (2) longer.
- 1104 200. p4 anterior branch of the paracristid (paracristid II) compared with paracristid I:
- 1105 (0) shorter; (1) as long as; (2) longer.
- 1106 201. p4 paracristid I orientation: (0) anteriorly; (1) anteriorly and slightly lingually;
- 1107 (2) anterolingually; (3) anterobuccally.

- 1108 202. p4 metaconid position: (0) close to protoconid; (1) separated.
- 1109 203. p4 protolophid orientation: (0) nearly transverse; (1) slightly oblique; (2)  
1110 considerably oblique.
- 1111 204. p4 protolophid: (0) notched; (1) lophid or shallow notched.
- 1112 205. Position of metaconid related to the protoconid on p4: (0) considerably more  
1113 posteriorly displaced; (1) slightly more posteriorly displaced; (2) transversely  
1114 displaced.
- 1115 206. Ridge on the buccal side of the protoconid of p4: (0) absent; (1) present and  
1116 smooth; (2) present with nodules.
- 1117 207. p4 metaconid twinned: (0) absent; (1) present.
- 1118 208. p4 cristid obliqua: (0) low but unreduced; (1) high; (2) high and composed of  
1119 two ridges; (3) low and reduced.
- 1120 209. The orientation of p4 cristid obliqua: (0) toward the midpoint of the protolophid;  
1121 (1) towards protoconid; (2) closer to the protoconid than to metaconid.
- 1122 210. p4 hypoconid: (0) small; (1) large.
- 1123 211. p4 entoconid: (0) absent; (1) present, distinctly smaller than hypoconid; (2)  
1124 present, comparable in size to hypoconid.
- 1125 212. p4 hypolophid: (0) absent; (1) weak with a faint rib, or curves lingually for a  
1126 short distance; (2) weak, curves along the posterior border; (3) lophid and  
1127 distinctly lower than protocristid; (4) lophid and approaching the protocristid.
- 1128 213. p4 talonid: (0) no broader than trigonid; (1) broader than trigonid. (DH97:24,  
1129 C05:52, in part)
- 1130 214. p4 hypoconulid: (0) present; (1) absent.
- 1131
- 1132 **m1-2**
- 1133 215. m1-2 lingual cingulid: (0) absent; (1) incomplete; (2) continuous and weak.
- 1134 216. m1-2 buccal cingulid: (0) complete; (1) continuous, weak; (2) interrupted at the  
1135 protoconid; (3) interrupted at the hypoconid;(4) incomplete, present on the

- 1136 hypoflexid; (5) absent.
- 1137 217. m1-2 trigonid compared with talonid: (0) shorter, (1) roughly equal in length.
- 1138 218. m1 trigonid: (0) wider than long; (1) as long as wide; (2) longer than wide.
- 1139 219. m2 trigonid: (0) wider than long; (1) as long as wide; (2) longer than wide.
- 1140 220. m2 mean width as percentage of length: (0) >75, (1) 71-74, (2) 69-70, (3) 67-68,  
1141 (4) 63-64, (5) 59-61. (H10:18)
- 1142 221. m1-2 paraconid: (0) less than half the height of the protoconid; (1) more than  
1143 half the height of the protoconid. (H10:28, similar to C05:50, DH:97:23,  
1144 HD04:31, HD03:31)
- 1145 222. molar paracristid: (0) present; (1) reduced, (2) absent.
- 1146 223. molar paracristid I (buccal branch) compared with protolophid: (0) shorter; (1)  
1147 as long as; (2) longer.
- 1148 224. molar paracristid II (anterior branch) compared with paracristid I (buccal  
1149 branch): (0) shorter; (1) as long as; (2) longer.
- 1150 225. m1-2 paracristid I orientation: (0) anteriorly; (1) slightly lingually; (2)  
1151 moderately lingually; (3) strongly lingually. (modified from B10:41)
- 1152 226. m1-2 paracristid with anterobuccal angle: (0) rounded, (1) sharp or bulging.  
1153 (H94:18, F02:88, HD03:18, HD04:18, H10:16)
- 1154 227. m1-2 protolophid orientation: (0) nearly transversely or slightly  
1155 posterolingually oblique; (1) somewhat posterolingually oblique, (2) distinctly  
1156 posterolingually oblique.
- 1157 228. Position of metaconid related to the protoconid on m1-2: (0) slightly more  
1158 posteriorly displaced; (1) considerably more posteriorly displaced; (2)  
1159 transversely displaced
- 1160 229. m1-2 premetacristid (anterior crest of metaconid): (0) present, (1) absent.  
1161 (HD04:41, RH14:189, in part)
- 1162 230. Molar twinned metaconid: (0) absent; (1) present. (M08:84, H94:4, DR13:64,  
1163 RH14:186, H09:54 in part)

- 1164 231. m1-2 protolophid: (0) deeply notched, (1) shallowly notched, (2) lophid.  
1165 (modified from H09:55, HD03:5, HD04:5, RH14:185, in part)
- 1166 232. m1-2 trigonid: (0) V-shaped; (1) U-shaped (CD12:54, AA07:50)
- 1167 233. m1-2 talonid: (0) not broader than trigonid; (1) broader than trigonid. (DH97:24,  
1168 C05:52, in part)
- 1169 234. m1-2 cristid obliqua: (0) low; (1) high, (2) highly reduced. (modified from  
1170 F02:82, HD03:15, HD04:15, H94:15, RR15:91, M08:83)
- 1171 235. Orientation of m1-2 cristid obliqua: (0) toward the midpoint of the  
1172 protolophid; (1) toward the protoconid; (2) closer to the protoconid than to  
1173 metaconid. (modified from F02:80, H10:13)
- 1174 In *Sifrhippus* and *Protohippus*, the cristid obliqua extends toward the midpoint  
1175 of the protolophid (state 0); In ceratomorphs, the cristid obliqua extends toward a  
1176 point buccal to the midpoint of the protolophid (state 2), even to the protoconid  
1177 (state 1).
- 1178 236. m1-2 hypolophid: (0) weak and deeply notched; (1) shallowly notched; (2)  
1179 lophid.
- 1180 237. m1-2 hypolophid orientation: (0) nearly transversely; (1) slightly  
1181 posterolingually oblique; (2) strongly posterolingually oblique. (modified from  
1182 F02:92)
- 1183 238. m1-2 hypoconulid: (0) small, (1) absent or cingular. (modified from RH14:201,  
1184 similar to DR13:66)
- 1185 239. m1-2 posthypocristid: (0) present; (1) absent. (RH14:198, in part)
- 1186 240. m1-2 hypolophid and cristid obliqua junction: (0) angled, (2) curved.
- 1187 241. m1-2 postmetacristid: (0) absent, (1) present.
- 1188 242. molar entoconulid: (0) indistinct or absent (1) distinct. (HD03:16, HD04:16,  
1189 H10:14, RH14:207, in part)
- 1190 243. molar entocristid: (0) absent; (1) present and anteriorly extended; (2) present  
1191 and curves slightly lingually. (modified from RR15:101)

1192

1193 **m3**

1194 244. m3 talonid: (0) narrower than trigonid; (1) as broad as the trigonid; (2) broader  
1195 than trigonid. (modified from DH97:24, C05:52, in part)

1196 245. m3 trigonid compared with talonid: (0) shorter, (1) roughly equal in length.

1197 246. m3 lingual cingulid: (0) absent; (1) present but incomplete.

1198 247. m3 buccal cingulid: (0) complete; (1) continuous, weak; (2) interrupted at the  
1199 protoconid; (3) interrupted at the hypoconid (4) incomplete, present on the  
1200 hypoflexid; (5) absent.

1201 248. m3 length: (0) short; (1) long. (M08:86)

1202 Length of crown is more than twice the width (state 1).

1203 249. m3 paraconid: (0) less than half the height of the protoconid; (1) more than half  
1204 the height of the protoconid. (H10:28, similar to C05:50, DH:97:23, HD04:31,  
1205 HD03:31)

1206 250. m3 paracristid: (0) present; (1) reduced; (2) absent.

1207 251. m3 paracristid orientation: (0) anteriorly or slightly lingually, (1)  
1208 anterolingually, (2) lingually. (B10:41)

1209 252. m3 paracristid with anterobuccal angle: (0) rounded, (1) sharp or bulging.  
1210 (H94:18, F02:88, HD03:18, HD04:18, H10:16)

1211 253. m3 protolophid orientation: (0) nearly transversely; (1) somewhat  
1212 posterolingually oblique, (2) distinctly posterolingually oblique.

1213 254. m3 protolophid: (0) deeply notched; (1) moderately notched; (2) shallowly  
1214 notched; (3) lophid. (modified from H09:55, HD03:5, HD04:5, RH14:185, in  
1215 part)

1216 255. m3 premetacristid (anterior crest of metaconid): (0) absent, (1) present.  
1217 (HD04:41, RH14:189, in part, coding reversed)

1218 256. m3 trigonid: (0) U-shaped; (1) V-shaped. (CD12:54, AA07:50)

1219 257. m3 metaconid buttress: (0) absent; (1) lingual, (2) buccal. (HD04:13, H10:12,

- 1220 RH14:188, in part)
- 1221 258. m3 cristid obliqua: (0) low; (1) high, (2) highly reduced. (modified from  
1222 F02:82, HD03:15, HD04:15, H94:15, RR15:106, M08:83)
- 1223 259. m3 cristid obliqua: (0) straight; (1) bowed buccally. (modified from H10:4)
- 1224 260. Orientation of m3 cristid obliqua: (0) toward the midpoint of the protolophid;  
1225 (1) toward the protoconid; (2) closer to the protoconid than to metaconid.  
1226 (modified from F02:80, H10:13)
- 1227 261. m3 posthypocristid: (0) present; (1) absent.
- 1228 262. m3 hypolophid: (0) deeply notched; (1) shallowly notched; (2) lophid.  
1229 (modified from F02:104, H09:58, HD03:28, HD04:28, H94:28)
- 1230 263. m3 hypolophid orientation: (0) nearly transversely; (1) slightly posterolingually  
1231 oblique; (2) strongly posterolingually oblique. (modified from F02:92)
- 1232 264. m3 hypoconulid: (0) lobe-like; (1) small and reduced, (2) absent or cingular.  
1233 (modified from DH97:16, RH14:204, H09:59, similar to DR13:67)
- 1234 265. m3 hypoconulid: (0) high, nearly as high as the talonid; (1) low, much lower  
1235 than the talonid. (B10:39)
- 1236 266. m3 hypoconulid buccal border: (0) toward the hypoconid; (1) toward the  
1237 midpoint of hypolophid. (RD13:70, F02:97, modified from RH14:206)
- 1238 267. m3 hypoconulid lingual border: (0) absent; (1) crest-like.
- 1239 268. m3 hypoconulid lobe buccal cingulid: (0) distinct; (1) absent or weak.
- 1240 269. m3 hypolophid and cristid obliqua junction: (0) angled; (2) curved.
- 1241 270. m3 postmetacristid: (0) absent, (1) present.
- 1242 271. Molar cristid obliqua compared with the hypolophid: (0) shorter; (1) equal; (2)  
1243 almost twice as long.
- 1244
- 1245 **Cranial characters**
- 1246 272. Skull type: (0) dolichocephalic; (1) mesaticephalic; (2) brachycephalic.  
1247 If the facial and cranium portions were demarcated by the postorbital process of

1248 the frontal (Qiu and Wang, 2007), dolichocephalic refers to the facial portion longer  
1249 than the cranium (state 0), mesaticephalic means facial as long as cranium (state 1),  
1250 brachycephalic refers to facial shorter the cranium (state 2).

1251 273. Dorsal surface of skull from the lateral view: (0) nearly flat above the orbits  
1252 and postorbital region; (1) nearly flat above the orbits, strongly convex over the  
1253 postorbital cranial region; (2) entire dorsal surface of the skull is concave, or  
1254 saddle-shaped; (3) generally convex and arched. (modified from M08:20)

### 1255 **Occipital region**

1256 274. Outline of the occipital: (0) bell-shaped and wider than high; (1) bell-shaped  
1257 and higher than wide; (2) trapezoid and higher than wide; (3) trapezoid and  
1258 wider than high; (4) triangular.

1259 275. Occipital: (0) the upper part projected posteriorly but not beyond the occipital  
1260 condyles; (1) the upper part projected posteriorly beyond the occipital condyles.  
1261 (modified from H89:3, AA07:18, CD12:19, similar to M08:41)

1262 276. Occipital condyle: (0) not high and almost rounded; (1) elongated vertically.  
1263 (RR15:128, AA07:19, BB95:21, CD12:20)

1264 277. Proportions of occiput: (0) dorsal portion narrower than ventral portion; (1)  
1265 dorsal portion as wide as the ventral portion. (modified from M08:36)

1266 278. The exoccipital (and/or supraoccipital) above the foramina magnum: (0)  
1267 anteriorly inclined; (1) nearly vertically displaced or slightly anteriorly  
1268 inclined.

1269 Since the sutures between the exoccipital and supraoccipital were usually  
1270 obliterated, this character refers to the bone between the excavated dorsal part and  
1271 foramen magnum.

1272 279. Occipital condyles in lateral view: (0) projected posteriorly to the exoccipital;  
1273 (1) not projected behind exoccipital. (modified from AA07:14, BB12:15)

1274 280. The distal extension of the paroccipital process: (0) short, above the level of the  
1275 ventral border of the occipital condyle; (1) long, slightly beyond the occipital



1276 condyle; (2) considerably beyond the occipital condyle.

1277

1278 **Basicranium**

1279 281. Hypoglossal foramen position between occipital condyle and paroccipital  
1280 condyle: (0) closer to occipital condyle; (1) equal distance; (2) distant from  
1281 occipital condyle and closer to paroccipital condyle.

1282 282. Basisphenoid orientation from the basioccipital: (0) rising dorsally; (1)  
1283 horizontal.

1284 283. Posterior extension of jugal: (0) onto to or just in front of the glenoid fossa; (1)  
1285 separated from the glenoid fossa by a fossa;

1286 284. Posterior end of jugal: (0) narrow and ridge-like; (1) wide and plate-like.

1287 285. Basioccipital: (0) smooth; (1) with a blunt median ridge; (2) with a sharp  
1288 median crest. (modified from AA07:25, BB95:17, CD12:26, character state  
1289 reversed)

1290 In rhinocerotids the basioccipital bears a sharp median crest (state 2).

1291 286. Orientation of basioccipital: (0) rising anterodorsally; (1) nearly horizontal.

1292 287. External auditory pseudomeatus: (0) mediolaterally angled; (1) posterolaterally  
1293 angled. (modified from M08:32)

1294 288. Exposure of mastoid: (0) narrow, laterally; (1) absent (amastoidy). (modified  
1295 from RH14:28)

1296 289. Interspace between occipital and squamosal for the mastoid process: (0) short,  
1297 on the ventral part between occipital and squamous; (1) long and slit-like; (2) a  
1298 narrow dorsal part present between occipital and squamosal, with the ventral  
1299 part concealed.

1300 290. Mastoid foramen: (0) present, between mastoid and occipital-supraoccipital; (1)  
1301 absent. (RH14:29)

1302 291. Paroccipital-posttympanic foramen: (0) absent; (1) present.

1303 Qiu and Wang (2007) named a foramen between the paroccipital process and

1304 posttympanic process as the paroccipital-posttympanic foramen (Qiu and Wang,  
1305 2007, Pl. 1, fig. 2). A similar foramen is also present in *Pappaceras*,  
1306 *Paraceratherium*, *Teletaceras*, *Sharamynodon*, *Amyrnodon*, and *Metamynodon*.

1307 292. The paroccipital process and posttympanic process: (0) separate; (1) fused.

1308 Qiu and Wang (2007) determined that the coalesced and enlarged paroccipital  
1309 and posttympanic processes is one of the most important features of *Juxia* and  
1310 *Paraceratherium*. We define this character as the anterolateral face of paroccipital  
1311 process completely appressed to the posttympanic process at least on the proximal  
1312 part (state 1).

1313 293. Position of the paroccipital process related to the posttympanic process: (0)  
1314 posteromedially; (1) medially; (2) posteriorly;

1315 In *Pappaceras*, *Juxia*, *Paraceratherium*, and *Sharamynodon*, the paroccipital  
1316 process is displaced posterior to the posttympanic process (state 2).

1317 294. Posttympanic process and paroccipital process: (0) relatively slender; (1)  
1318 transversely wide; (2) anteroposteriorly elongated (W16:43)

1319 295. Ventral extension of paroccipital process relative to the posttympanic process:  
1320 (0) approximately equally extended; (1) considerably longer.

1321 296. Ventral extremities of postglenoid process and the posttympanic process: (0)  
1322 widely separated; (1) close but not fused; (2) fused.

1323 297. Ventral extension of posttympanic process: (0) slightly shorter than postglenoid  
1324 process; (1) considerably shorter; (2) as long as or more ventrally extended.  
1325 (modified from RH14:27, H09:12, RR15:137, H01: C13)

1326 298. Postglenoid process to occipital condyle length, relative to the length of cranial  
1327 post-P1 portion of skull: (0) short ( $<1/5$ ), (1) long ( $>1/5$ ). (W16:38)

1328 299. Postglenoid foramen: (0) present; (1) absent. (RR15:119, RH14:26,  
1329 H09:11, C05:81, H01:C10)

1330 300. Postglenoid process facing: (0) anteriorly; (1) anterolaterally; (2) nearly  
1331 laterally. (modified from RR15:120, RH14:25, C05:86, H09:10, H01:C11).

1332 In amynodontids and paraceratheres, the postglenoid process is divided into  
1333 roughly equal-sized anterior and lateral facing parts, thus coded as anterolaterally  
1334 (state 1). In *Subhyracodon*, and *Trigonias* the anterior part is considerably smaller  
1335 than the lateral part, and main orientation is laterally (state 2). This character is  
1336 probably related to the well-developed postcotyloid process in rhinocerotids.

1337 301. Anterior face of the postglenoid process: (0) flat or concave and undivided; (1)  
1338 convex with a median ridge. (H01: C12).

1339 302. Postglenoid process: (0) relatively small and peg-like; (1) flattened and  
1340 transversely extended; (2) considerably elongated and twisted; (3) massive and  
1341 relatively short.

1342 303. Temporal condyle of mandibular fossa: (0) flat or slightly concave; (1) slightly  
1343 anteroposteriorly convex;

1344 304. Orientation of the temporal condyle: (0) anterolaterally; (1) transversely.

1345 In paraceratheres and amynodonts, the temporal condyles are anterolaterally  
1346 inclined (state 0), while in rhinocerotids the temporal condyles are transversely  
1347 extended (state 1).

1348 305. Foramen ovale: (0) separate from middle lacerate foramen, (1) confluent with  
1349 middle lacerate foramen. (RH14:18, C05:82, M08:33, similar to DR13:5,  
1350 H89:1)

1351 Although MacFadden (1976) used the confluence of foramen ovale and foramen  
1352 lacerate medium as a synapomorphic character of *Hyracotherium* and Equidae, there  
1353 is no confident evidence to support the confluence of these foramina in early  
1354 *Hyracotherium*-like taxa. In contrast, Gingerich (1981) observed the separate  
1355 condition present in some *Hyracotherium*-like specimens. We coded *Protorohippus*  
1356 *venticulum* as state 1, although the condition was poorly preserved in AMNH 4832.

1357 Although Scott (1941) stated that *Hyracodon* has the foramen ovale fused with  
1358 posterior opening of the alisphenoid canal (= foramen rotundum of Scott, 1941), it is  
1359 more likely that the foramen ovale of *Hyracodon* is fused with the middle lacerate

1360 foramen (AMNH 12303).

1361 306. Pterygoid fossa: (0) absent; (1) present. (W16:49)

1362 In *Hyracodon* in ventral view (AMNH 12303), the pterygoid fossa is situated on  
1363 either side of the basisphenoid and presphenoid, and bordered laterally and medially  
1364 by distinct ridges. On the posterior side, the fossa is open to the middle lacerate  
1365 foramen. On the posterolateral side, the fossa is separated from the glenoid fossa by  
1366 an arterial groove. *Lophialetes* and *Schlosseria* have similar pterygoid fossae (state 1)  
1367 (Li and Wang, 2010), however, the foramen ovale is separated from the middle  
1368 lacerate foramen.

1369 307. 'Temporal crest': (0) weak; (1) absent; (2) prominent.

1370 The temporal crest refers to the ridge between the nuchal crest and the  
1371 zygomatic arch (Bai et al., 2017)

1372 308. Frontal ridges: (0) converging into a median sagittal crest posteriorly just  
1373 behind the orbit, (1) converging more posteriorly, (2) separated as two ridges.  
1374 (modified RR15:122)

1375 309. Sagittal crest: (0) low; (1) high.

1376 Wall (1982) noted that the sagittal crest of amynodonts is high and laterally  
1377 compressed compared with relatively low sagittal crests of other perissodactyls.  
1378 *Pappaceras* and other paraceratheres also have high sagittal crests.

1379 310. Squamous-frontal contact: (0) absent; (1) present.

1380

### 1381 **Orbit and side wall of braincase**

1382 311. Sharp crest extending from the orbital foramen anteriorly: (0) absent; (1) short;  
1383 (2) long.

1384 312. Orbital portion of parietal: (0) contacting alisphenoid; (1) not contacting  
1385 alisphenoid (RH14:20)

1386 313. Orientation of the jugal-squamosal suture with respect to the horizontal plane:  
1387 (0) parallel; (1) oblique. (AA07:9, CD12:9)

- 1388 314. Ventral postorbital process: (0) absent; (1) weak; (2) prominent.
- 1389 315. Zygomatic process of squamosal contributes to the ventral postorbital process:  
1390 (0) no; (1) yes.
- 1391 316. Posterior part of zygomatic arch: (0) always lower than the level of the upper  
1392 border of the orbit; (1) reaching the same level as the upper border of the  
1393 orbital. (AA07:11, CD12:12, RR15:127 coding reversed)
- 1394 317. Postorbital process of the frontal: (0) weak or absent; (1) protuberant as an  
1395 elongated flange; (2) prominent and overhanging the orbital, but not protruding  
1396 from the frontal; (3) sturdy and short; (4) forming the bar in contact with  
1397 zygomatic arch.
- 1398 318. Supraorbital foramen or notch: (0) absent, (1) present. (H01:C9, RR15:118;  
1399 RH14:13, coding reversed)
- 1400 319. Anterior opening of alisphenoid canal: (0) in common with foramen rotundum;  
1401 (1) completely isolated.
- 1402 320. Foramen rotundum: (0) opening in common with the orbital foramen; (1)  
1403 opening in common with the anterior opening of the alisphenoid canal.  
1404 (modified from RH14:15).
- 1405 321. Position of the optic foramen: (0) approximately in middle between ethmoid  
1406 foramen and orbital foramen; (1) closer to the orbital foramen than to the  
1407 ethmoid foramen; (2) closer to the ethmoid foramen than to the orbital foramen.  
1408 (modified from HR14:14, H10:29, HD03:33, HD04:33, H89:2)
- 1409 322. Position of the sphenopalatine foramen: (0) far away from the maxillary  
1410 foramen; (1) below the maxillary foramen. (modified from RH14:8, H09:4)
- 1411 323. Retromolar space on the maxilla: (0) absent; (1) present. (AA07:22, BB95:4,  
1412 CD12:23)
- 1413 324. Anterior border of the orbit at the level of: (0) near the boundary of M2/M3; (1)  
1414 near the border of M1/M2; (2) near the border of P4/M1; (3) near the border of  
1415 P3/ P4.

1416 325. Zygomatic arch: (0) nearly parallel to the midline of the skull; (1) straight but  
1417 anteriorly convergent; (2) convex.

1418 326. Posterior end of zygomatic arch lobe-shaped blade: (0) absent; (1) present.

1419 Qiu and Wang (2007) concluded that the posterior end of the zygomatic arch in  
1420 *Juxia* is a lobe-shaped blade protruded upward, with a steep anterior rim (state 1). In  
1421 *Fostercooperia*, it is rudimentary.

1422 327. Postorbital width of skull: (0) constricted; (1) not constricted (M08:22)

1423

1424 **Facial portion**

1425 328. Anterolateral apophyses of the nasal: (0) present; (1) weak or absent.

1426 329. Narial incision: (0) above or anterior to canine; (1) above diastema between  
1427 canine and premolars; (2) above P1 and P2; (3) above P3 and P4; (4) above  
1428 molars; (5) retracted and excavated posteroventrally. (modified from DR13:1,  
1429 C05:56, H01:C8).

1430 330. Free end of nasal extending above the level of: (0) canine or premaxilla and  
1431 maxilla suture; (1) anterior end of the premaxilla; (2) P1; (3) around P4/M1; (4)  
1432 postcanine diastema.

1433 331. Posterior end of nasal: (0) above the center of the orbit; (1) near the anterior  
1434 border of the orbit; (2) considerably anterior to the orbit; (3) posterior to the  
1435 orbit.

1436 332. Premaxilla and nasal contact: (0) present; (1) absent. (RH14:4, modified from  
1437 C05:60)

1438 333. Anterior ends of premaxillae: (0) unfused; (1) fused.

1439 334. Lacrimal tubercle: (0) weak or absent; (1) distinct with a single tubercle; (2)  
1440 distinct with two tubercles.

1441 335. Nasolacrimal contact: (0) absent; (1) present. (CD12:3, AA07:3; H01:C3,  
1442 RR15:115, coding reversed; modified from F02:4)

1443 336. Facial exposure of the lacrimal: (0) large; (1) smaller or reduced. (RR15:123,

- 1444 H01:C3, F02:4, H09:5)
- 1445 337. Lacrimal foramen: (0) single; (1) two.
- 1446 338. Narrow grooves on posterolateral nasals and frontals at the posterior terminus  
1447 of the narial incision: (0) absent; (1) present, short, largely restricted to  
1448 posterolateral nasals; (2) present, long and straight, extending well onto frontals.  
1449 (C05:73)
- 1450 339. Medial grooves on dorsal surface of frontals: (0) absent; (1) present. (C05:75)
- 1451 340. Frontal between two orbits: (0) relatively narrow; (1) expanded;  
1452 The frontal width between orbitals narrower than the zygomatic arch width at  
1453 the level of the orbitals (state 0). equal or wider than zygomatic arch (state 1)
- 1454 341. Maxillary fossa (preorbital fossa): (0) absent; (1) present.  
1455 *Pappaceras*, *paraceratheres*, and *amynodonts* possess maxillary fossae (state 1).  
1456 In some *tapiroids*, the maxillary fossa is also present; however, its homology with  
1457 those of *rhinocerotoids* are uncertain.
- 1458 342. When present, maxillary fossa: (0) shallow; (1) well-developed pocket; (2)  
1459 vertical groove near the orbit. (H01: C6; modified RR15:117)
- 1460 343. Infraorbital foramen: (0) above P4/M1; (1) above P3/P4; (2) above P2/P3; (3)  
1461 above P3; (4) above P4; (5) above M1/2; (6) above M2/3. (modified from H01:  
1462 C7)
- 1463 344. Paired horns: (0) absent; (1) present on nasal.  
1464
- 1465 **Palate**
- 1466 345. Palatine process of premaxilla: (0) absent, (1) present  
1467 In *Juxia* and *Paraceratherium* the palatine process of the premaxilla is absent  
1468 (state 0), while in *Pappaceras* and *Rostriamynodon*, the palatine process is present  
1469 (state 1).
- 1470 346. Incisive foramen: (0) paired, fissure-like; (1) single, median. (modified from  
1471 H01: C5)

1472 347. Posterior border of palatine at the level of: (0) near the border of M2 and M3;  
1473 (1) near the border of P4 and M1; (2) near M1/M2; (3) posterior to M3.  
1474 (modified RR15:134, AA07:23)

1475 348. Body of the premaxilla: (0) slender; (1) stout, laterally expanded; (2) stout,  
1476 laterally compressed;

1477 In *Pappaceras* and some amynodonts, the horizontal process of the premaxilla  
1478 is stout and laterally expanded in dorsal view (state 1). In *Paraceratherium* and  
1479 *Subhyracodon*, the horizontal process of the premaxilla is stout and somewhat  
1480 laterally compressed (state 2) related to the reduction of incisors.

1481

#### 1482 **Mandible**

1483 349. Height of the mandibular corpus: (0) constant; (1) increasing posteriorly.  
1484 (AA07:30, BB95:25, CD12:32, B10:54, RR15:147)

1485 350. Body of mandible: (0) anteriorly extended with incisors procumbent; (1)  
1486 anterodorsally extended with incisors more erect. (modified from CD12:35)

1487 351. Posterior border of the mandibular symphysis: (0) anterior to p2; (1) anterior  
1488 border of p2; (2) near p2/p3; (3) near p3/4. (modified from AA07:33, BB95:24,  
1489 CD12:37, RR15:143)

1490 352. Vascular impression of mandible: (0) moderately developed, (1) weak or  
1491 absent.

1492 353. Angle of mandible: (0) not expanded; (1) strongly posteriorly extended; (2)  
1493 moderately posteriorly extended. (modified from B10:55, AA07:31, BB95:26,  
1494 CD12:34, RR15:148)

1495 354. Retromolar space on the mandible: (0) absent; (1) present. (AA07:32, CD12:36,  
1496 B10:56)

1497 355. Anterior border of ascending ramus: (0) slanted posteriorly; (1) nearly vertical;  
1498 (2) convex anteriorly.

1499 356. Posterior border of ascending ramus: (0) rounded convex; (1) slanted anteriorly;



- 1500 (2) vertical.
- 1501 357. Posterior border of ascending ramus medial inflection: (0) absent; (1) present.
- 1502 358. Condylar process of mandible: (0) low; (1) high.
- 1503 If the distance between the condylar process and the alveolar border is less than
- 1504 the length of m2-m3, the condylar process is low (state 0) (Qiu and Wang, 2007). If
- 1505 the distance between the condylar process and the alveolar border is greater than the
- 1506 length of m2-m3, the condylar process is high (state 1) (e.g. *Equus*).
- 1507 359. Postcotyloid process: (0) absent; (1) present. (H01:C14)
- 1508 360. Coronoid process: (0) posteriorly projected at the apex; (1) vertical.
- 1509 361. Mandibular notch: (0) wide, (1) shallow.
- 1510



1553 *Chowliia\_laoshanensis*  
1554 ??????0?11000?00(01)???110-0--0---???10???0?01(02)?00?-00---100100301  
1555 000011021112000--100(03)0010001-0110003101001102002111100021000  
1556 0021102020120?0?1???10?000?000002101-0-00000003112000112-0000100  
1557 1000011111001101010000201000002100(12)010211010021101001110011  
1558 10000000201010100111001????????????????????????????????????????  
1559 ?????????????????????????????11?????????  
1560  
1561 *Meridiolophus\_expansus*  
1562 ?????????????????????????????????????????????????????????????  
1563 ?????????????????????????????????????????????????????????300?10000  
1564 1001-1-0100000211210?20--?01310001000311110011010012022110(03)00  
1565 00?0011?10100110210010000?10?1000?10000002111????????????????  
1566 ?????????????????????????????????????????????????????????????  
1567  
1568 *Isectolophus\_latidens*  
1569 ??????20110?0?0020110?0-10-0---01000110000(01)21?0(01)1?(01)(03)(012  
1570 )0110(01)10010000?00(12)040121100--11130110001-0110003000?02-0?10  
1571 ?1?210?0100010002-021?(02)220?0?????????00?(02)0???1?01-?-?00?00??011  
1572 ?00202?00?30?0010011001020010100?0002010(04)0?04?00111101011002  
1573 21010001110(15)100011200?012?11000110001000?01????1?110?????????02?  
1574 010101?0201???010120?????2000??1?0?11?0000-10???0002?????????  
1575  
1576 *Karagalax\_mamikhelensis*  
1577 ???????0111????020-1-????2100--0-101011?1001212111-00--2?00100101100  
1578 0?1020111000--0?(01)30010001-0001?01?0000110200?(12)(01)(12)100000  
1579 00000011020?(12)(12)0000???0?????000201212001-0111001002112113202  
1580 001011000?0012011100100210020(01)1000000051000(01)102101100211  
1581 0100020000110000210000211000110001????????????????????????0???0??  
1582 ?????????????????1????0????0???0????1????0?0?????????  
1583  
1584 *Gandheralophus*  
1585 ?????????????????????????????????10101100?0121?011000--?11000010?10000  
1586 1020112000--01(03)(03)1000001-000100310000100200121210000010100  
1587 0100201221000310??100300?20????????????????0020?210130101111010011  
1588 0010101000002000200011030002?00101021011001?011010111031?00101  
1589 00000111000012010????????????????????????????????????????????  
1590 ?????????????????????????????  
1591  
1592 *Yimengia*  
1593 02011110100????122000?0122200--0-10101111001212000000--?10010101  
1594 1100012030023000--1?121112002002?1000111222-(01)210201210001100

1595 10022-1212022010010??10131---01313001-11110010130110032021101(01  
1596 )11021001112011011110012102110400020000(01)10010111112111(01)0  
1597 00?00400000020000021211---100????????????????????????????????????  
1598 ?????????1????????????????102?????11???????????

1599

1600 *Rhodopagus pygmaeus*

1601 ???????01????????????????????????????10100011002210000?00--21000000011000  
1602 12010123000--11241010001-1001000120212-121010121012(03)01021222-  
1603 121102012??100??0?31---00002101-(01)1110000100111030---011111(01)1  
1604 00040011131111001111111050003000211101011(01)012111(01)0002005  
1605 00001120000011212---100????????????????????????????????????????  
1606 ?????????????????????????????1?????????????

1607

1608 *Indolophus*

1609 ?????????????????????????????????????0??11????????2????????100110101?0001201  
1610 1011000---13401??0?0-00?000320?112-0110?00200????????????????????  
1611 ?????????????????????????????????????????????????????????????  
1612 ?????????????????????????????????????????????????????????????  
1613 ?????????????????????????????????????????????????????????????

1614

1615 *Heptodon*

1616 0000?210110000?12(01)01?0(01)11(23)(12)00---10101101001214011200--  
1617 2100100100100012040122100--0113100?001-0000000100222-1210?01210  
1618 10100010012-12110200000000?1002(01)0?200001?01-??000210000111003  
1619 1101012010000002100020110100020000103000200021102001102111110  
1620 002100300001020002-112011---1000000001011?000010??000100001010  
1621 100201?1?010130010001000111101001?0000-(1 2)01?010(0 1)(0 1)011(1  
1622 2)(0 1)1(0 1)0(0 1)0

1623

1624 *Helaletes nanus*

1625 ???????01100(01)0?12201111112110---?10101111001212(01)1000(13)--210  
1626 ?110101100102021121002--01132112001-0110000111212-0210?21210101  
1627 01010002-0211221010?1????0?21-?-000?1111-??1100000201110031201012  
1628 1110100021000201101001001001050003000211021011021111100021005  
1629 00000020002-112011---100????????????????????????????????????0??30??  
1630 ?11??0?3??1?00100001200?????1?2??1???????

1631

1632 *Desmatotherium intermedium*

1633 ???????0110????13201100112100---?10001111002211(01)010130121001001  
1634 111001220201211130101131112001-1010000111202-02101012101000101  
1635 0002?021122?00??????????1-?-000?3011-0?110110000111003110100211111  
1636 00020100101111000211?110?0002000(02)01021021021211110021005000

1637 00030002-11212---100????????????????????????????????????????????????????????????  
1638 ?????????????????0??????0?????????  
1639  
1640 *Paracolodon\_fissus*  
1641 ??????01?????13200021122101110-1110111100221000111301220001011?  
1642 10012200012001301011(34)1000001-1110000220112-0210121210101010  
1643 20212-021122001?????????????00002101-111010?00000110031101002111  
1644 00000400102111010002110110500010002110210110222111-002?0050000  
1645 1020002--1212----00?????????????????????0??0?????????????????????????????  
1646 ?????????????????????????????????  
1647  
1648 *Dilophodon\_minusculus*  
1649 ??????01?000????1??111?3??0--?0010111100221?00001011?????????????????  
1650 ?????????????11420?20?1-10?0?001111?2-0210?012?01?????????????????????  
1651 ???0?31-?-0001??01-1?1100000001110031111011110111002001020111100  
1652 1111111050003000211101011021211110021005000001200?2-1?212---10  
1653 0?????????????????????????????????????????????????????????????????????????  
1654 01??????????  
1655  
1656 *Selenaletes\_scopaeus*  
1657 ??????????????????????????????????????????????????????????????????????????  
1658 ??????????????????????????????????????????????????????????????????????????  
1659 ?????????????????????????????????????????????????????????????05000(45)100(12)11101  
1660 01100(12)2111(01)002??05000010200???????2---?0?????????????????????????  
1661 ??????????????????????????????????????????????????????????????????????????  
1662  
1663 *Colodon\_occidentalis*  
1664 ?0???(14)?01?11010133001201223011120100031100022110011130001002  
1665 121110001220110211130011142000011-1000000120202-02101012101000  
1666 0010002-021222001011000-1-31-?-00001121111112010002(02)110031111  
1667 021112110004001020111100211221105000002----02002?02121111002000  
1668 50-2--020-02-111111---100201100110201021?????000102011010??0001??  
1669 00-100????020001433112??0001210??1101112020010?0  
1670  
1671 *Plesiocolopirus\_hancocki*  
1672 ??????01?000001330111011?2?0--1010101110001212011000--?10301011?  
1673 000102020121100--011(34)20000?1-100?003110212-021002121010001012  
1674 00?-021?22001?????????21-?-0000112111111(01)01002021100311?1012112  
1675 ?1000?10102111010001110110?00000102110210210212111100200?20001  
1676 11201?2-112111---100????????????????????????????????????0?????????????????  
1677 ???????????101210??11100??0??????  
1678

1679 *Hesperaletes\_borineyi*  
1680 ??????01?11(01)??12101??11121(01)0--(01)?101011?101221(02)011?00--21  
1681 032101??10?1?202012??00--0?132112001-(01)00??03?110?2-021??2221010  
1682 101012002-021?2200101?00?100300120?????2?1???0?10?????0??1101?????  
1683 ?21?0??1????1????0?1?(01)2??40?0??0??0??0111201111?0?100??0??0?02?  
1684 002?011?1----?0?00????????????????????????01010?10201????????11????01100  
1685 130?1?2??0210122?1102???????????????

1686  
1687 *Irenolophus*  
1688 01?1?010111112113302020103100--11001030101?0112001204--02110123  
1689 0101?2?01?0022?04--112(03)111?011-1000000020?22-0210?012101000002  
1690 0202-1210222010110??10?301?20141112111111001014021?00311110111  
1691 10010010000010111100121001104000101011110102102-2111-000000500  
1692 101130002--1212----10000?000100?0??111000?000100001010?0??01??????  
1693 30????01??011110?0??00000-10??0?010??011?10?0

1694  
1695 *Telelophus\_medius*  
1696 ?????1?0111112113301010103300--1100103010000101001203--021001200  
1697 10002?2110022?03--11201110011-1000000-232-2-02100012101000003-3-2  
1698 -1210222020?10011013011201411121111110000140011103111102111101  
1699 0000000020111100221111103000101021110102102-2111-00000030020-0  
1700 30-02--1212----100????????????????????0??0????????????????????????  
1701 ?????????????????0??10102?1???

1702  
1703 *Deperetella*  
1704 ?????????????13300020103200--1100113010000122001205--0210?1201?00  
1705 0202220022105--21101000011-1000000--31-2-?2100012101000003-3-2-12  
1706 10222020310??100101120241212111111040034012110311110211123100  
1707 300000001012002212301(12)0000001002110102102-2111-000001000111  
1708 120-02--1112----00????????????????????????????????????????????  
1709 ?????????????????000???????????

1710  
1711 *Minchenoletes\_erlianensis*  
1712 ?????????????????????????????????????????????????????????000102011110012020  
1713 013000--11142002001-0001000111112-121020221010000000102-1212020  
1714 00????????????????????????????????????????????????????????????04  
1715 00??10011110101101121011001????????????????????????????????????  
1716 ????????????????????????????????????????????????????????????????

1717  
1718 *Schlosseria\_magister*  
1719 ??????0111102?1320201113210--1111111311101212011200--010112030  
1720 1110012030122000--11132112001-0000000112112-0210122200001000001

1721 02-0211221100?????0??01?2000?1111-02010000020121003110100001101  
1722 00021211001101000211011041?1?1010110210110122101000(01)0105000  
1723 000100?00212001112001????????????????????????????0000?01?0?0?1?0?0200  
1724 1?0?????12110?01??000??20????000?0???????

1725

1726 *Lophialetes\_expeditus*

1727 ?????1?0111102?132120(12)1113210--1111111011111212011?00--0201120  
1728 001111012040022000--11142112001-0001000112212-(01)2102022000000  
1729 0000102-1212220110010011013(01)0?20021313100201000002001000311  
1730 0100201101000310?011110100021100104111?0010110210110122101000  
1731 00105100000200?0021210111200000410?110?0??1001-????000?00000?101  
1732 201?0??0?020??01010014?11001?1000??400101?????????????

1733

1734 *Eoletes*

1735 ??0????0120?01?13200021113210--110(12)20221110121(23)011?00--22020  
1736 012011(12)0012031122000--(01)1132110001-0000000112102-0210002200  
1737 10100010102-021?22011????????????????0?21313?1020100100210100031101  
1738 002111010002100100100200020100104101?001011021011112?10100000  
1739 105000000200?0001210111100103?100110????????????????0?0?0?00?????01??  
1740 ??0?040?????0100100?010??000??40??3????????????????

1741

1742 *Ampholophus\_luensis*

1743 ??????????????011020110-10-0--0011101101111012111100--220110011010  
1744 1011021110000--100200?2011-01?02032001?110200?121101?????????????????  
1745 ?????????????????????????????????????????????????????????????????  
1746 ?????????????????????????????????????????????????????????????????  
1747 ?????????????????????????????????????????????????????????????????

1748

1749 *Kalakotia*

1750 ??????????????010-1-110-11-0--0-100112011?121201021121?000100201001  
1751 012220122000--111221200?1-0001000112112-01??00220010100000102-02  
1752 1?02010????????????????????????????????004011100102-0011110211000111100  
1753 110100020020100000?100111021001012211100000100100000100?00212  
1754 001111001????????????????????????????????????????????????????????????  
1755 ??????????????????????

1756

1757 *Breviodon\_acares*

1758 ???????1-----122-1-101-11-0--0-111011010?1210001-00--?000100301?000?  
1759 20?0121000--1113?0000?1-0010001200?12-??10?2?200?0100000002-021?2  
1760 211?????110031-?-1--?-?-----?????????????????????????????????????  
1761 31?001001111010?1012111100000104010010200?01212101102000?0?00  
1762 00?20??2101-??02?100?0001?100?01????0?010????02?00?????????1000??????

1763 0?10???0??????  
1764  
1765 *Protapirus*  
1766 ???1?1?01?1101013301100103100--1010011111001?1101?00(01)--?100120  
1767 11100101202012200(01)--111320000?1-1?00003011?02-021012121010100  
1768 010002-021?2200101100?10131-?-0000213010211211000111?00311?10?11  
1769 1211000410?0201111000212211051000?101110210??02120111000001501  
1770 1010300?2--1212-----0000110011??011200????100?020010101??200?1?00-0  
1771 20?????0100013411?10102101210??0?10112?2001??0  
1772  
1773 *Tapirus*  
1774 0310011011111001330112012130131201000111001221200121500120322  
1775 0101001102020022?1520211421120?1-10?0001030?02-1210021210100000  
1776 00002-121?220000?100010031-?-0000213011311241000001000310020311  
1777 1241000400?0-?101200321240105000?-2----02101?02-1011-000?0050-2--0?  
1778 0??2--1??2-----00111000?12101101002??10000201101011?20111102000001  
1779 200300013231120111001220012100112?200?000  
1780  
1781 *Hyrachyus\_modestus*  
1782 02?110101110000010-2-10122100--0-1010?????1?121010001100010010012  
1783 01001120210210110011(13)32100001-101010(03)212102-0210121210101  
1784 01010002-021122001041000101100?20000211011111000001111100312?0  
1785 0121101000031000011111000210001040001?00011021011002211110010  
1786 10400001020000?21212---00010100001120??01102?100010000101000?20  
1787 001000-0300?1001000?011000100000102(01)??0?1021211011100  
1788  
1789 *Ephyrachyus*  
1790 ???????0?1?????1210000011210102200110220101121210121220011121121  
1791 11110120210220122011102?22001-1?01102212112-121010120010100011  
1792 012-121102101?????????0??200?(01)1?00-111100?01111210(03)3(01)2(01)  
1793 0(01)121111000130010111210(01)01211101040?0510011102?0?11122211  
1794 1001?1040100002?000121212---100????????????????????????????????????  
1795 ?????????????????????????????????????????????????????????????  
1796  
1797 *Fouchia*  
1798 ???????01?1111013101110112100--30110013000?1210000000--200?2001?0  
1799 0??0?2000011?00-???142002001-0110?03?10112-0210?00210101000100?2-  
1800 021?02100??????????01?200??211?1011100000122110?302??01?110000003  
1801 0010111101001211001020001100111101011012110100?20003010011200  
1802 01121111---?-0????????????????????????????????????????????????????  
1803 ???????????????001??11?????  
1804







1889

1890 *Eggysodon*

1891 ??????01?111111330?02012320101210001??1010221210121(12)(01)0121?  
1892 21??111?0112021022111(01)02133111?00100221100211112-0211?112101  
1893 20100?13-2-021?222022-??-?022001201312101-1111(01)100131011(01)13  
1894 1?100121123001111010011111?01212?011410021000211010210?2211110  
1895 00111501001130001011212----000????????????????????????????????????  
1896 ?????????????????????????????????????????????????????????????

1897

1898 *Juxia*

1899 01201000111?1?11330112011310120210100111110221210121400121?200  
1900 1111000120?1022011012133111200210020103211112-?211201210123000  
1901 ?03-2-021?0200201212000010012013121101111100(01)0121121?0311110  
1902 02111100012111011111110021120105000110011110(01)0211122111100(  
1903 02)01050100003(01)0?1011212----1001010101102001110?-?112200211113  
1904 000?001?1?010120???0111103111?010?00?1010010?0021010210110

1905

1906 *Urtinotherium*

1907 ??????01?0111113300020123?0101210000??1???221?101?12?0121?2023?1  
1908 1??1?20?1022?120021031002001-0220100111?12-0211211210?23000?03-2  
1909 -021?021?201214?0010001202412000-11110011340021003111121211130  
1910 0112001011111120121130112000410021110102101221111000001201001  
1911 030001011212----100????????????????????????????????????????????  
1912 ??????????????????????0021011001000

1913

1914 *Paraceratherium*

1915 1?4--4-01?????13300020123101302?00103311??221210??1201221??02311  
1916 1001020?1022012211103111200210220100211002-02122?1210123000303  
1917 -2-021?020012---4--1-?1---013121?0?0?110011341011013121021211130001  
1918 21010111111200211301120003?0021110?0211?22111100000150?0010300  
1919 ?1011212----10013101011120111001-?112200?11113??0?12-?0?011120??21  
1920 11201?3??111??000?100001020031211001100

1921

1922 *Rostriamynodon\_grangeri*

1923 ?41?02?1-----?12?0?0??10???0--????????????????????????????????  
1924 ?????1?4?01?????0??1?0??????2-??1????21??1???0????2-??1??2?0?03102010231  
1925 ---0?????????????0100001100310?20?111020010????0?1????0?211?111?0?0  
1926 3?0011?21?0?11?22?1110?02105010012??0?1121?12----10110?????????01??0  
1927 ??????1?0?0?1?3100?001?1??11120????001?0?1??000??00?11501001012101  
1928 1211100

1929

1930 *Caenolophus\_promissus*



1973 12000111001112411150?2?1020012110211112?1110002005010012?00?11  
1974 11222----10221(23)01001010100101-?1?1112?011?3??1??01?0?010120????0  
1975 1201110?0110?000?1000?10?0?31011001000  
1976  
1977 *Uintaceras\_radinskyi*  
1978 ?????0001?1111?1(23)20222?113211001?0010111101121200121101221010  
1979 0311101112021022011010?141102001-0221000211112-0211?0121010000  
1980 010202-021?0200?0?????0020012000?2101-1111001100001100312100111  
1981 1100?00?11110012100000110010410030000?0101011(01)0221111002100  
1982 4000011300?0?21212----10010?1???11?????????????0?001?0?1???????01?????0?0  
1983 20?????1?00?2??0?0?????????30?????0?102?11?1???  
1984  
1985 *Teletaceras*  
1986 0?3??1001?1111?1320112012320102210010111111121200121120?200110  
1987 11111?1120210220112021341112002(01)0221003211112-0212201200123  
1988 00021202-021?0201?031?3?1012?????????????????????0??201?02311?10??111  
1989 1000??00?001111100021110105100??000?11000?10022111100210??00001  
1990 0210?0011212----1000010000112001210???100011?01111110?010?1?0101  
1991 200?2?0100001111?010000?0020??2?????????????????  
1992  
1993 *Trigonias*  
1994 0?3011001?111111330202012320130110000301100(12)212001215001210  
1995 2020211001(01)202102201(23)002133111200210220100212002-02122012  
1996 (01)01230003-3-2-021?0221?031?3?11-1011201?13131102110210??011100  
1997 3111100211021001220100111110001112111510141011011010110012111  
1998 10000115010001?00?1111212----100122001111100?2101-1001012?012121  
1999 10?02-???011120????0110102111001?00010-100122000100000?100  
2000  
2001 *Subhyracodon\_occidentalis*  
2002 1?30-1-01?11?1?13302020123201302100003011002212001?150?021?2020  
2003 1110?11202102??1221113311120?210220100212112-021220121112(03)00  
2004 03-3-2-021?0201?1-1?3--1-1(01)0?2?24121311??11?31012001102312101?0  
2005 112310012101001111100?212311040?031010111010?110(12)2111100011  
2006 05010011?00?1111212----1000201000122011210--1000012?01212110?22-?  
2007 ??011120????02101020?10????00?0-2001220121011011111  
2008  
2009 *Menoceras\_arikareense*  
2010 1-3--4-01?01???13300021123?013021110?30110?221?001?1520120?2120?1  
2011 10?1?202002??1520213421100?210200000111112-0212211211?200003-3-2  
2012 -?21?0201?1-1-3--1-11---024?11211?211131013011101311110?2112410013  
2013 1111011111001212411111114101011101021012221100001111010011300  
2014 ?1121222----00012300101120112101-1001012?01212110?22-?1?02012110?

2015 ?0210112021?0??000?0-21????1111001201110  
2016  
2017 *Rhinoceros\_unicornis*  
2018 1-3--4101?0112113302021123201302111003011012212101215001201210  
2019 3?11?11?2020022?15202134211100210110100112112-0210001201121000  
2020 ?1(23)-2-021?02111?---3--1--1---0000??211111231000011100311(01)1000  
2021 1124100041211111?1?001012411051221102000101021010221100000105  
2022 01000130001101222----10022300000220112101-101101210?212111022-12  
2023 101110010200210112111011000010-2001020021001001

2024 **Supplementary References.**

- 2025 1. Wang JW. A new genus of ceratomorphs (Mammalia) from middle Eocene of  
2026 China. *Vert PalAsiat* **26**, 20–34 (1988).
- 2027 2. Radinsky LB. Early Tertiary Tapiroidea of Asia. *Bull Am Mus Nat Hist* **129**, 181–  
2028 264 (1965).
- 2029 3. Gabunia LK, Kukhaleishvili RE. A Zaysan *Rhodopagus* (Perissodactyla,  
2030 Tapiroidea). *Paleontologicheskii Zhurnal* **25**, 107–114 (1991).
- 2031 4. Lucas SG, Schoch RM. The systematics of *Rhodopagus*, a late Eocene  
2032 hyracodontid (Perissodactyla: Rhinoceroidea) from China. *Bulletin of the*  
2033 *Geological Institutions of the University of Uppsala, N.S.* **9**, 43–50 (1981).
- 2034 5. Dashzeveg D, Hooker JJ. New ceratomorph perissodactyls (Mammalia) from the  
2035 Middle and Late Eocene of Mongolia: their implications for phylogeny and dating.  
2036 *Zool J Linn Soc* **120**, 105–138 (1997).
- 2037 6. Hooker JJ. Character polarities in early Eocene perissodactyls and their  
2038 significance for *Hyracotherium* and infraordinal relationships. In: *The evolution of*  
2039 *perissodactyls* (eds Prothero DR, Schoch RM). 79–101 Oxford University Press  
2040 (1989).
- 2041 7. Wood HE. Revision of the Hyrachyidae. *Bull Am Mus Nat Hist* **67**, 181–295  
2042 (1934).
- 2043 8. Radinsky LB. *Hyrachyus*, *Chasmootherium*, and the early evolution of Helatetid  
2044 tapiroids. *Am Mus Novit* **2313**, 1–23 (1967).
- 2045 9. Radinsky LB. A review of the rhinocerotoid family Hyracodontidae  
2046 (Perissodactyla). *Bull Am Mus Nat Hist* **136**, 1–46 (1967).
- 2047 10. Schoch RM. Two unusual specimens of *Helaletes* in the Yale Peabody Museum  
2048 collections, and some comments on the ancestry of the Tapiridae (Perissodactyla,  
2049 Mammalia). *Postilla* **193**, 1–20 (1984).
- 2050 11. Huang X, Wang J. Notes on *Hyrachyus* (Mammalia, Perissodactyla, Tapiroidea)  
2051 from the Middle Eocene of Yunqu basin, Shanxi Province. *Vert PalAsiat* **40**, 211–  
2052 218 (2002).
- 2053 12. Gabunia LK. On a new member of Hyrachyidae (Perissodactyla, Ceratomorpha)  
2054 from the Eocene of the Zaisan Depression (eastern Kazakhstan). *Paleontol J* **33**,  
2055 88–93 (1999).
- 2056 13. Kordikova EG. A new Eocene vertebrate fauna from South-eastern Kazakhstan  
2057 (Aktau Mountaains, Dzhungarian Alatau). *Vestnik KazGU* **5**, 180–185 (1998).
- 2058 14. Huang XS, Qi T. Notes on late Eocene tapiroids from the Lunan Basin eastern  
2059 Yunnan. *Vert PalAsiat* **20**, 315–326 (1982).
- 2060 15. Thewissen JGM, Williams EM, Hussain ST. Eocene mammal faunas from  
2061 northern Indo-Pakistan. *J Vert Paleont* **21**, 347–366 (2001).
- 2062 16. Lucas SG, Holbrook LT, Emry RJ. The lophialetid ceratomorph *Eoletes*

- 2063 (Mammalia) from the Eocene of the Zaysan Basin, Kazakstan. *Proceedings of the*  
2064 *Biological Society of Washington* **114**, 988–992 (2001).
- 2065 17. Ranga Rao A, Obergfell F. *Hyrachyus asiaticus*, new species of an upper Eocene  
2066 tapiroid (Mammalia, Perissodactyla) from Kalakot, India. *Directorate of Geology,*  
2067 *Oil & Natural Gas Commission, Dehra Dun, India, Special Paper* **3**, 1–8 (1973).
- 2068 18. Chow MC, Qi T. Mammals from the Middle Eocene Kuanchuang Formation of  
2069 Sintai, Shandong. *Vert PalAsiat* **20**, 302–314 (1982).
- 2070 19. Qi T, Meng ZY. The discovery of *Hyrachyus modestus* and *Rhodopagus* sp. nov.  
2071 Perissodactyla, Mammalia in Laiwu County, Shandong. *Vert PalAsiat* **21**, 103–  
2072 108 (1983).
- 2073 20. Qi T. The Middle Eocene Arshanto Fauna (Mammalia) of Inner Mongolia. *Ann*  
2074 *Carnegie Mus* **56**, 1–73 (1987).
- 2075 21. Wang HB, Bai B, Meng J, Wang YQ. A new species of *Forstercooperia*  
2076 (Perissodactyla: Paraceratheriidae) from Northern China with a systematic  
2077 revision of Forstercooperiines. *Am Mus Novit* **3897**, 1–41 (2018).
- 2078 22. Wood HE. A primitive rhinoceros from the late Eocene of Mongolia. *Am Mus*  
2079 *Novit* **2146**, 1–11 (1963).
- 2080 23. Lucas SG, Schoch RM, Manning E. The systematics of *Forstercooperia*, a middle  
2081 to late Eocene hyracodontid (Perissodactyla, Rhinoceroidea) from Asia and  
2082 Western North-America. *J Paleont* **55**, 826–841 (1981).
- 2083 24. Wang HB, Bai B, Meng J, Wang YQ. Earliest known unequivocal rhinocerotid  
2084 sheds new light on the origin of Giant Rhinos and phylogeny of early  
2085 rhinocerotoids. *Scientific Reports* **6**, 1–9 (2016).
- 2086 25. Bai B, Meng J, Mao F-Y, Zhang Z-Q, Wang Y-Q. A new early Eocene  
2087 deperetellid tapiroid illuminates the origin of Deperetellidae and the pattern of  
2088 premolar molarization in Perissodactyla. *PLoS One* **14**, 1–26 (2019).
- 2089 26. Wood H. Some early Tertiary rhinoceroses and hyracodonts. *Bull Am Paleontol*  
2090 **13**, 5–105 (1927).
- 2091 27. Hooker JJ. The beginning of the equoid radiation. *Zool J Linn Soc* **112**, 29–63  
2092 (1994).
- 2093 28. de Bonis L, G., Bouvrain GK, Tassy. P. Un crâne de chalicothère (Mammalia,  
2094 Perissodactyla) du Miocène supérieur de Macédoine (Grèce): remarques sur la  
2095 phylogénie des Chalicotheriinae. *Palaeovertebrata* **24**, 135–176 (1995).
- 2096 29. Holbrook LT. Comparative osteology of early Tertiary tapiromorphs (Mammalia,  
2097 Perissodactyla). *Zool J Linn Soc* **132**, 1–54 (2001).
- 2098 30. Antoine P. Phylogénie et évolution des Elasmotheriina (Mammalia,  
2099 Rhinocerotidae). *Mémoires du Muséum National d'Histoire Naturelle* **188**, 1–359  
2100 (2002).
- 2101 31. Froehlich DJ. Quo vadis *Eohippus*? The systematics and taxonomy of the early



- 2102 Eocene equids (Perissodactyla). *Zool J Linn Soc* **134**, 141–256 (2002).
- 2103 32. Hooker JJ, Dashzeveg D. Evidence for direct mammalian faunal interchange  
2104 between Europe and Asia near the Paleocene-Eocene boundary. In: *Causes and*  
2105 *Consequences of Globally Warm Climates in the Early Paleogene* (eds Wing SL,  
2106 Gingerich PD, Schmitz B, Thomas E). 479–500 Geological Society of America  
2107 Special Paper (2003).
- 2108 33. Hooker JJ, Dashzeveg D. The origin of chalicotheres (Perissodactyla, Mammalia).  
2109 *Palaeontology* **47**, 1363–1386 (2004).
- 2110 34. Colbert MW. The facial skeleton of the early Oligocene *Colodon* (Perissodactyla,  
2111 Tapiroidea). *Palaeontol Electron* **8**, 1–27 (2005).
- 2112 35. Anquetin J, Antoine PO, Tassy P. Middle Miocene Chalicotheriinae (Mammalia,  
2113 Perissodactyla) from France, with a discussion on chalicotheriine phylogeny. *Zool*  
2114 *J Linn Soc* **151**, 577–608 (2007).
- 2115 36. Muhlbachler MC. Species taxonomy, phylogeny, and biogeography of the  
2116 Brontotheriidae (Mammalia: Perissodactyla). *Bull Am Mus Nat Hist* **311**, 1–475  
2117 (2008).
- 2118 37. Holbrook LT. Osteology of *Lophiodon* Cuvier, 1822 (Mammalia, Perissodactyla)  
2119 and its phylogenetic implications. *J Vert Paleont* **29**, 212–230 (2009).
- 2120 38. Bai B, Wang YQ, Meng J. New craniodental materials of *Litolophus gobiensis*  
2121 (Perissodactyla, "Eomoropidae") from Inner Mongolia, China, and phylogenetic  
2122 analyses of Eocene chalicotheres. *Am Mus Novit* **3688**, 1–27 (2010).
- 2123 39. Hooker JJ. The mammal fauna of the early Eocene Blackheath Formation of  
2124 Abbey Wood, London. *Monogr Palaeontogr Soc* **164**, 1–157 (2010).
- 2125 40. Chen SK, Deng T, He W, Chen SQ. A new species of Chalicotheriinae  
2126 (Perissodactyla, Mammalia) from the late Miocene in the Linxia Basin of Gansu,  
2127 China. *Vert Palasiat* **50**, 53–73 (2012).
- 2128 41. Kondrashov PE, Lucas SG. Nearly complete skeleton of *Tetraclaenodon*  
2129 (Mammalia, Phenacodontidae) from the Early Paleocene of New Mexico:  
2130 morpho-functional analysis. *J Paleont* **86**, 25–43 (2012).
- 2131 42. Danilo L, *et al.* A New Eocene Locality in Southern France Sheds Light on the  
2132 Basal Radiation of Palaeotheriidae (Mammalia, Perissodactyla, Equoidea). *J Vert*  
2133 *Paleont* **33**, 195 - 215 (2013).
- 2134 43. Rose KD, *et al.* Early Eocene fossils suggest that the mammalian order  
2135 Perissodactyla originated in India. *Nat Commun* **5**, 1–9 (2014).
- 2136 44. Robinet C, Remy JA, Laurent Y, Danilo L, Lihoreau F. A new genus of  
2137 Lophiodontidae (Perissodactyla, Mammalia) from the early Eocene of La Borie  
2138 (Southern France) and the origin of the genus *Lophiodon* Cuvier, 1822. *Geobios*  
2139 **48**, 25–38 (2015).
- 2140
